# Supplementary material for: Computationally Designed AMPs with Antibacterial and Antibiofilm Activity against MDR Acinetobacter baumannii
Source: MDPI journal article supplement (doi:10.3390/antibiotics12091396), 2023-09-01
Supplement: s1 [file s1]

Supplemental Materials:

Supplemental materials for “Computationally Designed AMPs with Antibacterial and Antibiofilm Activity against MDR *Acinetobacter baumannii*” By Fahad M. Alsaab, Scott N. Dean, Shravani Bobde, Gabriel G. Ascoli and Monique L. van Hoek

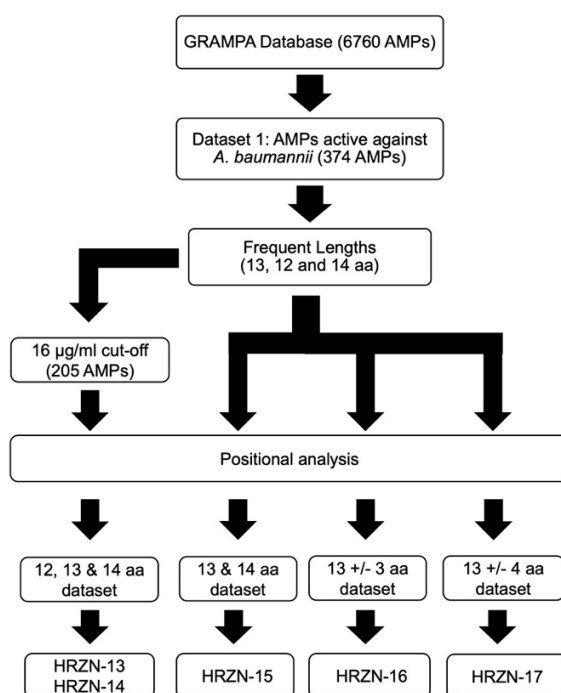

**Figure S1.** Flowchart of DFT plus positional analysis (PA) method used to design HRZN peptides.

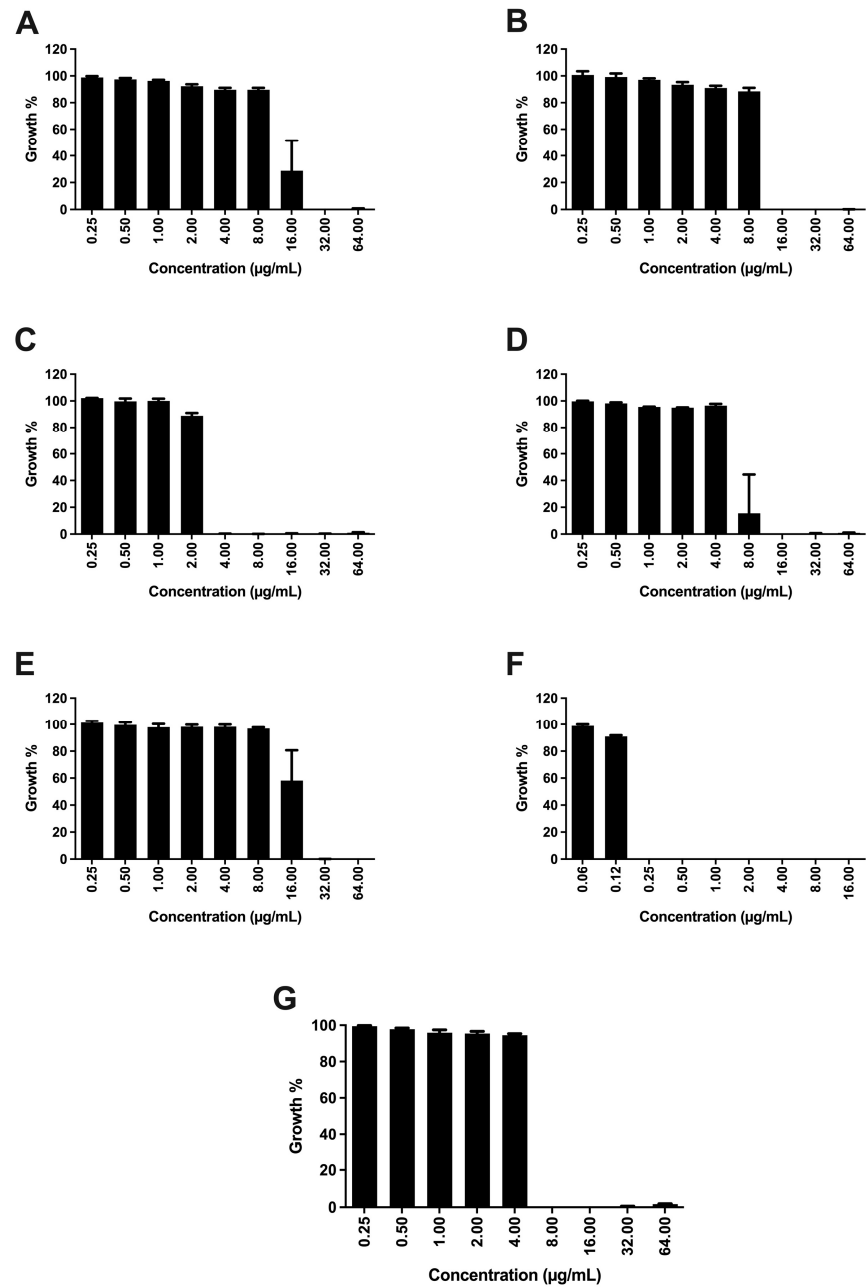

**Figure S2.** Minimum inhibitory concentration (MIC) of peptides against *A. baumannii* AB5075. (A) HRZN-13, (B) HRZN-14, (C) HRZN-15, (D) HRZN-16, (E) HRZN-17, (F) polymyxin B and (G) LL-37 resulted in MIC of 32, 32, 4, 16, 32, 0.5 and 8 µg/mL, respectively.

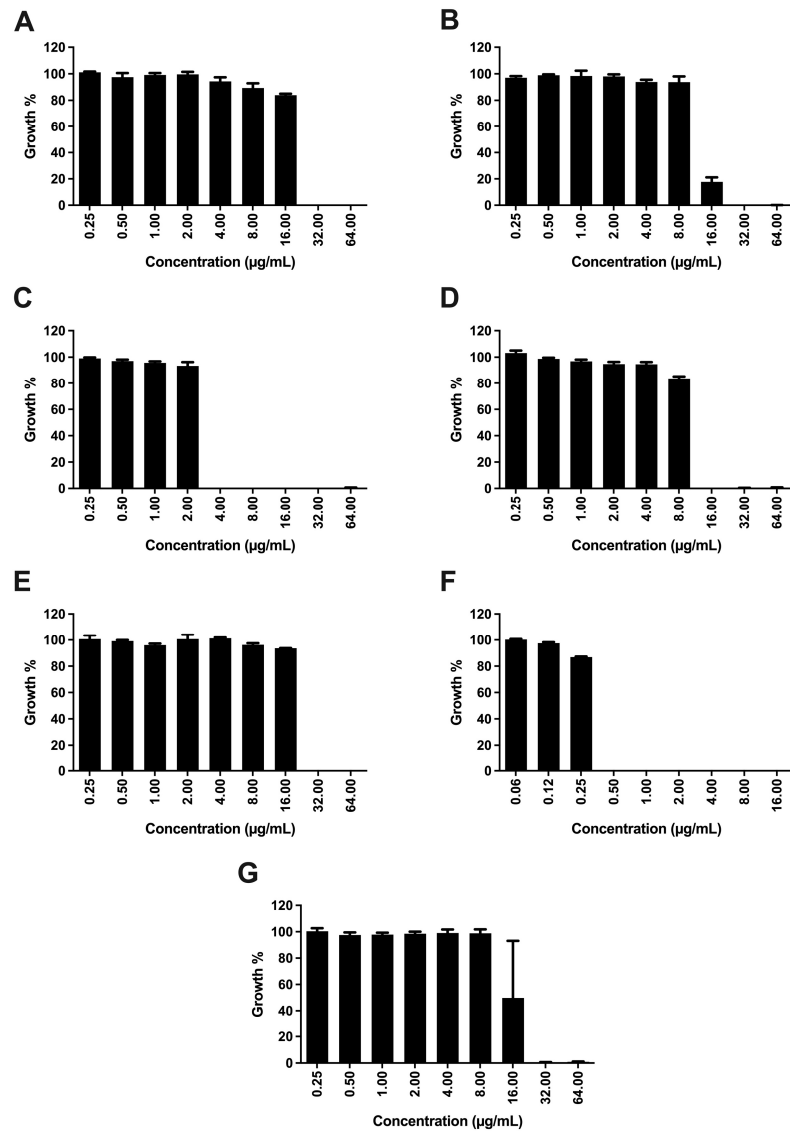

**Figure S3.** Minimum inhibitory concentration of peptides against *A. baumannii* BAA-1710. (A) HRZN-13, (B) HRZN-14, (C) HRZN-15, (D) HRZN-16, (E) HRZN-17, (F) polymyxin B and (G) LL-37 resulted in MIC of 32, 32, 4, 16, 32, 0.5 and 32 µg/mL, respectively.

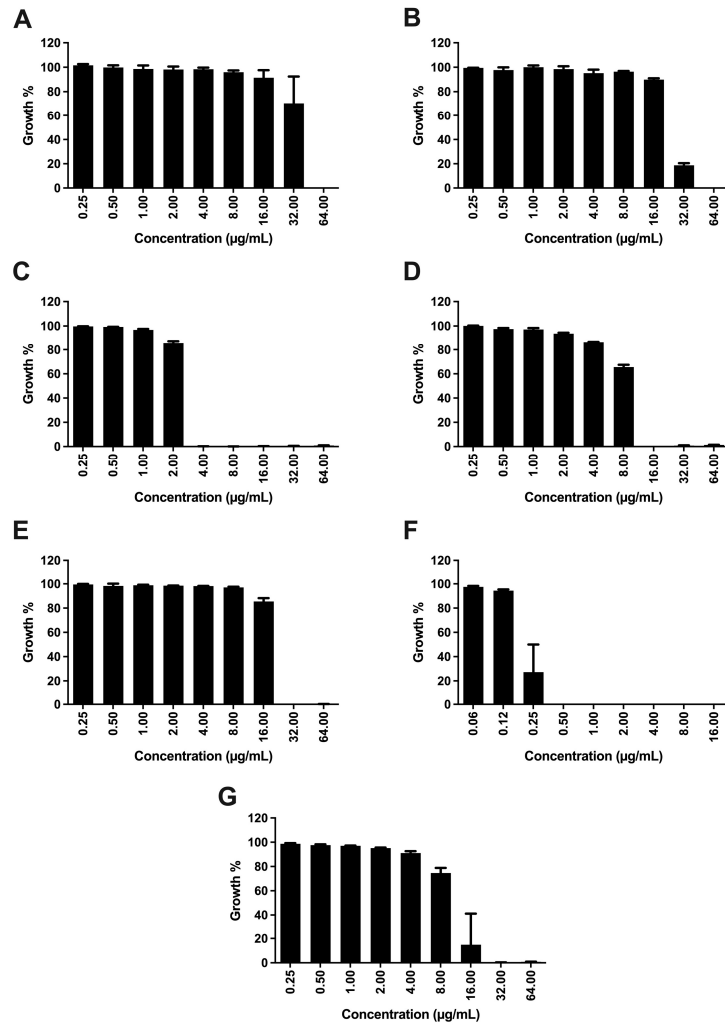

**Figure S4.** Minimum inhibitory concentration of peptides against *A. baumannii* BAA-1794. (A) HRZN-13, (B) HRZN-14, (C) HRZN-15, (D) HRZN-16, (E) HRZN-17, (F) polymyxin B and (G) LL-37 resulted in MIC of 64, 64, 4, 16, 32, 0.5 and 32 µg/mL, respectively.

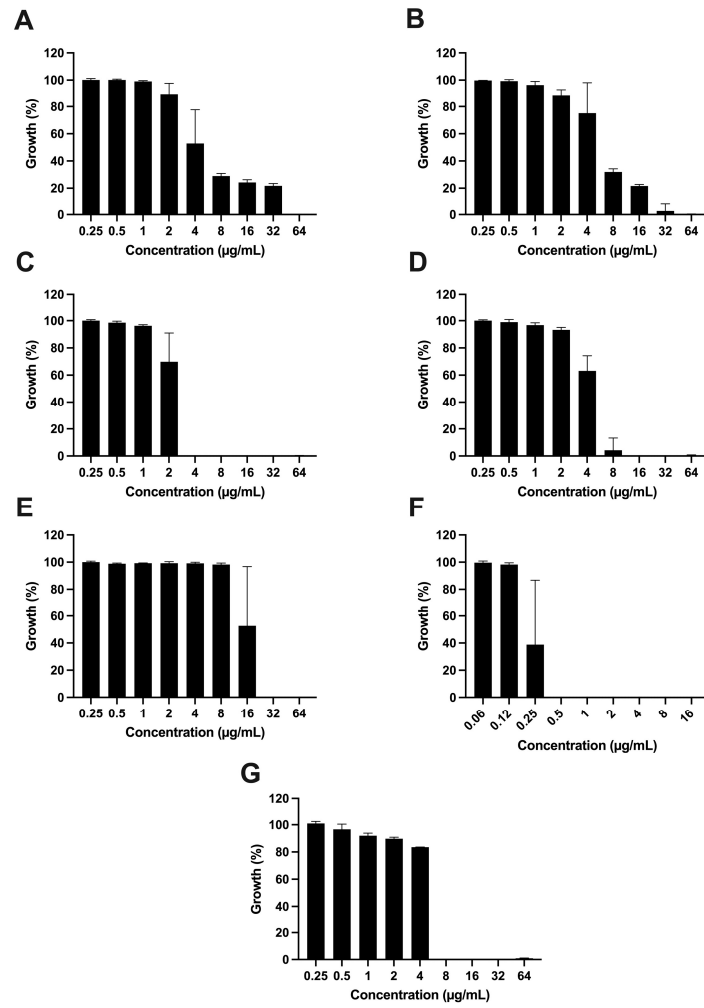

**Figure S5.** Minimum inhibitory concentration of peptides against *A. baumannii* BAA-1800. (A) HRZN-13, (B) HRZN-14, (C) HRZN-15, (D) HRZN-16, (E) HRZN-17, (F) polymyxin B and (G) LL-37 resulted in MIC of 64, 64, 4, 16, 32, 0.5 and 8 µg/mL, respectively.

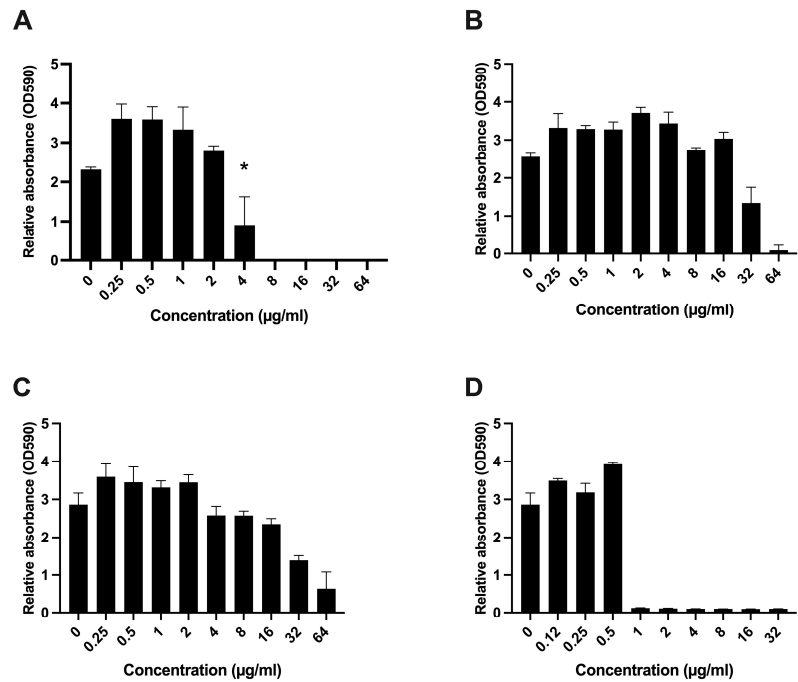

**Figure S6.** Minimum biofilm inhibition concentration (MBIC) of (A) HRZN-15, (B) LL-37, (C) IDR-1018 and (D) polymyxin B against *A. baumannii* BAA-1800. Biofilm detection on a polystyrene 96-well plate at 37°C after 24 h of growth in TSB was detected as the absorbance of crystal violet stain (590 nm). Percent biofilm production is indicated (n=3), relative to “0 peptide/antibiotic” control. Asterisk \* indicates  $P < 0.05$  (unpaired t-test).

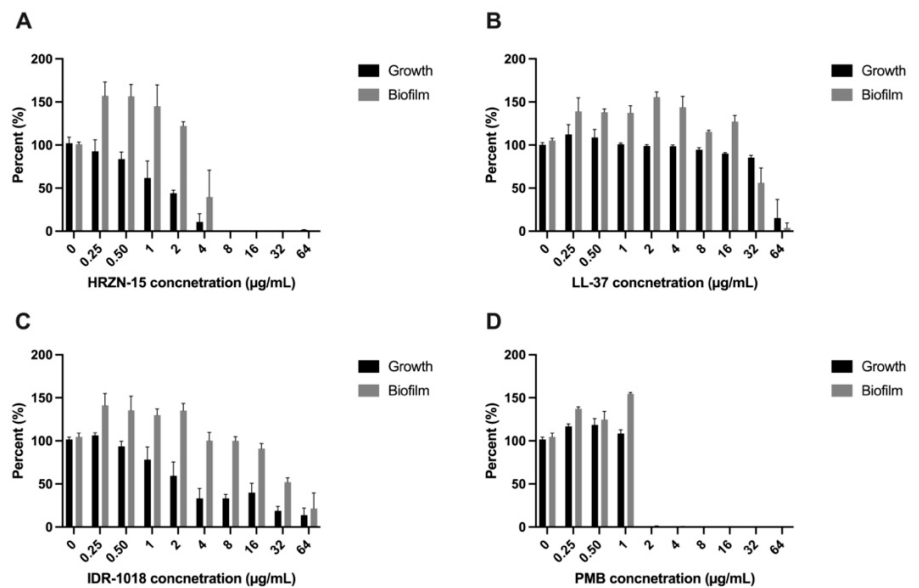

**Figure S7.** Minimum biofilm inhibition concentration (MBIC) of (A) HRZN-15, (B) LL-37, (C) IDR-1018 and (D) polymyxin B against *A. baumannii* BAA-1800. Panels indicate bacterial growth (absorbance at 600 nm) represented in black bars with “0 peptide/antibiotic” control set to 100%. Biofilm detection on a polystyrene 96-well plate at 37°C after 24 h of growth in TSB was detected as the absorbance of crystal violet stain (590 nm). Percent biofilm production is indicated by gray bars (n=3), relative to “0 peptide/antibiotic” control.

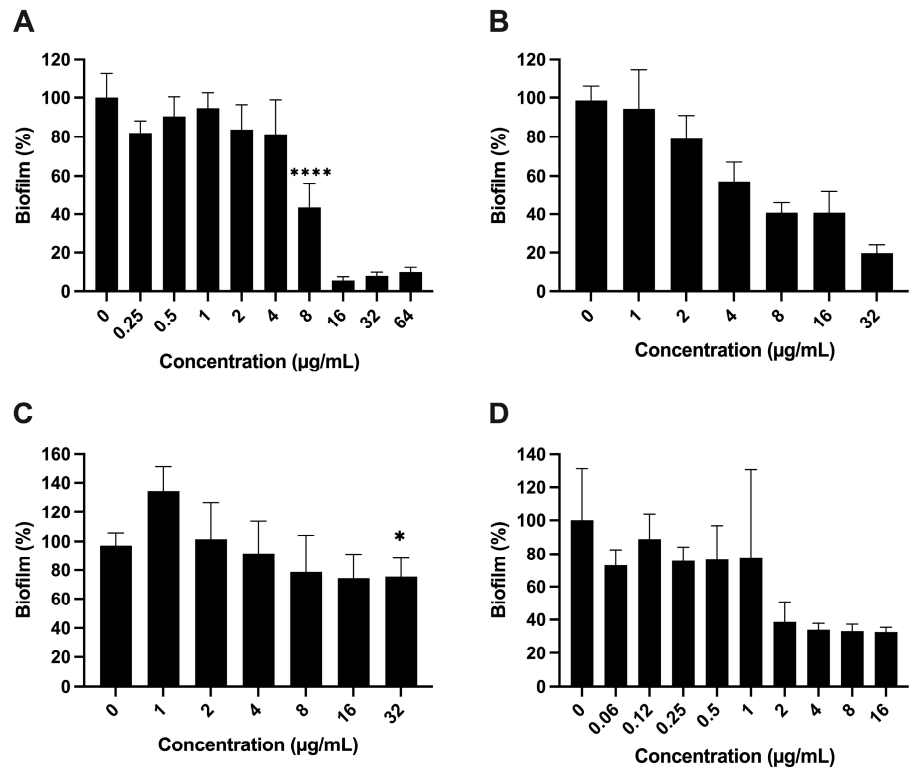

**Figure S8.** Minimum biofilm eradication concentration (MBEC) of (A) HRZN-15, (B) LL-37, (C) IDR-1018 and (D) polymyxin B against AB5075 (n = 6). Biofilm mass on pegs was detected at the absorbance of crystal violet stain (590 nm). Percentage biofilm mass is calculated relative to “0 peptide/antibiotic” control. The experiment was performed twice. (\*  $P < 0.05$  and \*\*\*\*  $P < 0.0001$ ).

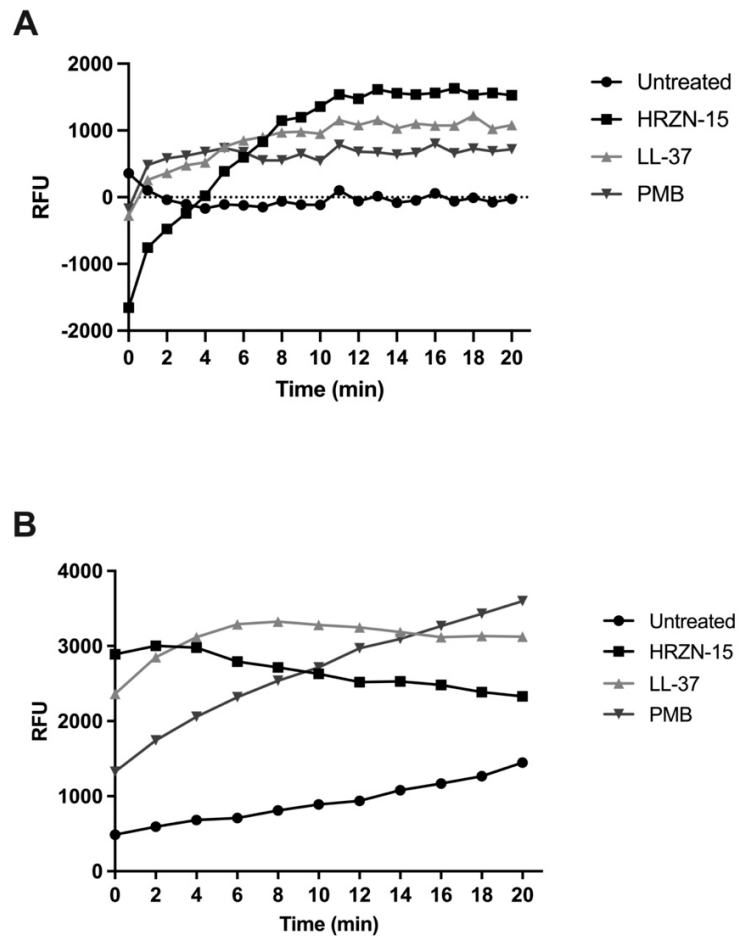

**Figure S9.** Kinetics of (A) membrane depolarization (DiSC<sub>3</sub>(5)) and (B) disruption (EtBr) of HRZN-15, LL-37 and polymyxin B (PMB) against AB5075 upon exposure of 50  $\mu\text{g}/\text{mL}$  of each compound.



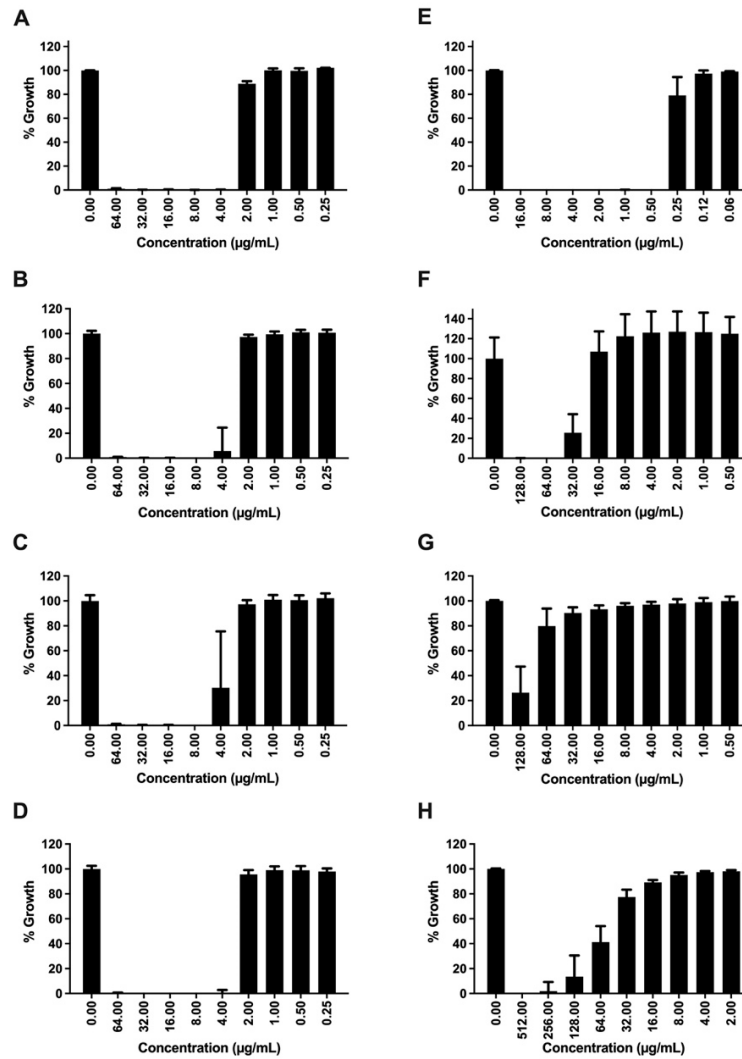

**Figure S10.** *In vitro* resistance acquisition induction of AB5075 upon exposure of HRZN-15 and colistin for 15 days. (A – D) shows consistent MIC values of AB5075 exposed to HRZN-15 on passage 0, 5, 10 and 15 (from top to bottom). (E – H) represents MIC of colistin against colistin-exposed bacteria performed on passage 0, 5, 10 and 15.

**Table S1.** *A. baumannii*-active peptides from GRAMPA database [43].

| Strain      | Sequence                              | µM   | µg/mL |
|-------------|---------------------------------------|------|-------|
| ATCC 19606  | AAYLLAKINLKALAALAKKIL                 | 3.6  | 8.0   |
| NA          | AAYLLAKINLKALAALAKKIL                 | 7.2  | 16.0  |
| CCARM 12036 | AFHHIFRGIVHVGKTIHRLVTG                | 2.0  | 5.0   |
| CCARM 12005 | AFHHIFRGIVHVGKTIHRLVTG                | 2.0  | 5.0   |
| CCARM 12035 | AFHHIFRGIVHVGKTIHRLVTG                | 2.0  | 5.0   |
| CCARM 12037 | AFHHIFRGIVHVGKTIHRLVTG                | 2.0  | 5.0   |
| ATCC 19606  | AGRKGQGGKVRKAKTRSSRAGLQFPVGRVHRLLRKGN | 60.1 | 256.0 |

|            |                              |      |       |
|------------|------------------------------|------|-------|
| ATCC 19606 | AGYLLGKINLKALAALAKKIL        | 3.7  | 8.0   |
| NA         | AGYLLGKINLKALAALAKKIL        | 3.7  | 8.0   |
| ATCC 19606 | AGYLLGKINLKPLAALAKKIL        | 3.6  | 8.0   |
| NA         | AGYLLGKINLKPLAALAKKIL        | 3.6  | 8.0   |
| ATCC 19606 | AGYLLPKINLKPLAKLPKKIL        | 54.9 | 128.0 |
| NA         | AGYLLPKINLKPLAKLPKKIL        | 54.9 | 128.0 |
| NA         | AKKVFKRLGIGKFLHSAKKF         | 3.1  | 7.2   |
| KCTC 2508  | AKKVFKRLGIGKFLHSAKKF         | 6.3  | 14.4  |
| NA         | AKRHHGYKRKFH                 | 81.8 | 128.0 |
| NA         | ALASLLKTL SKA AKKALKTLLKALSA | 1.4  | 3.7   |
| ATCC 19606 | ALASLLKTL SKA AKKALKTLLKALSA | 2.9  | 7.7   |
| M89952     | ALASLLKTL SKA AKKALKTLLKALSA | 2.9  | 7.7   |
| ATCC 17978 | ALASLLKTL SKA AKKALKTLLKALSA | 5.8  | 15.4  |
| M89941     | ALASLLKTL SKA AKKALKTLLKALSA | 5.8  | 15.4  |
| ATCC 19606 | ALASLLKTL SKAKKKKLK TLLKALSA | 0.4  | 1.1   |
| ATCC 17978 | ALASLLKTL SKAKKKKLK TLLKALSA | 0.4  | 1.1   |
| M89941     | ALASLLKTL SKAKKKKLK TLLKALSA | 0.4  | 1.1   |
| M89952     | ALASLLKTL SKAKKKKLK TLLKALSA | 0.7  | 1.9   |
| NA         | ALASLLKTL SKAKKKKLK TLLKALSA | 0.7  | 1.9   |
| M89955     | ALKSLLATL SKA AKKALKTLLAALSK | 0.7  | 1.9   |
| NA         | ALKSLLATL SKA AKKALKTLLAALSK | 0.7  | 1.9   |
| M89953     | ALKSLLATL SKA AKKALKTLLAALSK | 1.4  | 3.7   |
| ATCC 19606 | ALKSLLATL SKA AKKALKTLLAALSK | 2.9  | 7.7   |
| ATCC 17978 | ALKSLLATL SKA AKKALKTLLAALSK | 2.9  | 7.7   |
| M89941     | ALKSLLATL SKA AKKALKTLLAALSK | 2.9  | 7.7   |
| ATCC 19606 | ALKSLLATL SKAKKKKLK TLLAALSK | 0.4  | 1.1   |
| ATCC 17978 | ALKSLLATL SKAKKKKLK TLLAALSK | 0.4  | 1.1   |
| M89941     | ALKSLLATL SKAKKKKLK TLLAALSK | 0.4  | 1.1   |
| M89952     | ALKSLLATL SKAKKKKLK TLLAALSK | 0.7  | 1.9   |
| NA         | ALKSLLATL SKAKKKKLK TLLAALSK | 1.4  | 3.9   |
| M89955     | ALKSLLKTL SAAAKKALATLLKALSK  | 0.4  | 1.1   |
| M89953     | ALKSLLKTL SAAAKKALATLLKALSK  | 0.7  | 1.9   |
| NA         | ALKSLLKTL SAAAKKALATLLKALSK  | 1.0  | 2.7   |
| ATCC 19606 | ALKSLLKTL SAAAKKALATLLKALSK  | 1.4  | 3.7   |
| ATCC 17978 | ALKSLLKTL SAAAKKALATLLKALSK  | 1.4  | 3.7   |
| M89941     | ALKSLLKTL SAAAKKALATLLKALSK  | 1.4  | 3.7   |
| M89963     | ALKSLLKTL SAAAKKALATLLKALSK  | 2.9  | 7.7   |
| ATCC 17978 | ALKSLLKTL SAAKKKKLATLLKALSK  | 0.2  | 0.6   |
| ATCC 19606 | ALKSLLKTL SAAKKKKLATLLKALSK  | 0.4  | 1.1   |

|             |                                        |       |       |
|-------------|----------------------------------------|-------|-------|
| M89941      | ALKSLLKTL SAAKKKKLATLLKALSK            | 0.4   | 1.1   |
| NA          | ALKSLLKTL SAAKKKKLATLLKALSK            | 1.4   | 3.9   |
| ATCC 17978  | ALKSLLKTL SKAAAAALKTLLKALSK            | 2.9   | 7.7   |
| M89941      | ALKSLLKTL SKAAAAALKTLLKALSK            | 2.9   | 7.7   |
| ATCC 19606  | ALKSLLKTL SKAAAAALKTLLKALSK            | 5.8   | 15.4  |
| M89963      | ALKSLLKTL SKAAAAALKTLLKALSK            | 5.8   | 15.4  |
| NA          | ALKSLLKTL SKAAAAALKTLLKALSK            | 92.8  | 246.2 |
| ATCC 19606  | ALWHHLLHLLHSAHHLG                      | 15.0  | 31.9  |
| ATCC 19606  | ALWKKLLKKLLKSAKKLG                     | 1.9   | 3.9   |
| ATCC 19606  | ALWMTLKKKVLKAAAKALNAVLVGANA            | 0.4   | 1.1   |
| ATCC 17978  | ALWMTLKKKVLKAAAKALNAVLVGANA            | 0.7   | 2.0   |
| NA          | ALWMTLKKKVLKAAAKALNAVLVGANA            | 1.4   | 3.9   |
| NA          | ALWMTLLKKVLKAAAKALNAVLVGANA            | 0.7   | 1.9   |
| ATCC 19606  | ALWMTLLKKVLKAAAKALNAVLVGANA            | 2.8   | 7.8   |
| ATCC 17978  | ALWMTLLKKVLKAAAKALNAVLVGANA            | 2.8   | 7.8   |
| ATCC 19606  | ALWRRLRLRLLRSARRLG                     | 3.8   | 8.5   |
| NA          | AMVGT                                  | 17.1  | 8.2   |
| NA          | AMVSS                                  | 15.2  | 7.5   |
| ATCC 15308  | AQWFAIQHISLNPPRSTIAMRAINNYRWR          | 1.5   | 5.3   |
| ATCC 15308  | AQWFAIQHISLNPPRSTIAMRAINNYRWRSKNQNTFLR | 0.9   | 4.0   |
| ATCC 19606  | AVAGEKLWLLPHLLKMLLTPTP                 | 163.8 | 400.0 |
| Q12         | AWRWKAFRNCWRVRSSSL                     | 13.9  | 32.0  |
| Q13         | AWRWKAFRNCWRVRSSSL                     | 27.7  | 64.0  |
| NA          | CLRKLKRLLC                             | 22.8  | 32.0  |
| NA          | CYCRIPACIAGERRYGTICIYQGRLWAFCC         | 0.3   | 1.0   |
| CIP 70      | CYCRIPACIAGERRYGTICIYQGRLWAFCC         | 1.2   | 4.0   |
| NA          | DCYCRIPACIAGERRYGTICIYQGRLWAFCC        | 0.3   | 1.0   |
| CIP 70      | DCYCRIPACIAGERRYGTICIYQGRLWAFCC        | 1.1   | 4.0   |
| ATCC 19606  | DDALHHLLHHLLHHL                        | 100.0 | 182.1 |
| ATCC 19606  | DDALKHLLKHLLKHL                        | 50.0  | 89.7  |
| ATCC 19606  | DDALKKLLKKLLKKL                        | 25.0  | 44.2  |
| ATCC 19606  | DDALRHLLRHLLRHL                        | 100.0 | 187.8 |
| ATCC 19606  | DDALRRLRLRLLRRL                        | 100.0 | 193.5 |
| ATCC 19606  | DHYNCVSSGGQCLYSACPIFTKIQGT CYRGKAKCCK  | 65.1  | 256.0 |
| NA          | DSHAKRHHGYKRKFHEKHSHRGY                | 0.2   | 0.5   |
| ATCC 19606  | EKALEKLIAIQKAIKMLNGWFTGVGFRRKR         | 8.0   | 28.5  |
| M3237       | EKALEKLIAIQKAIKMLNGWFTGVGFRRKR         | 8.0   | 28.5  |
| ATCC 17978  | EKALEKLIAIQKAIKMLNGWFTGVGFRRKR         | 8.0   | 28.5  |
| CCARM 12036 | FAHHIFRGIVHVGKTIHRLVTG                 | 4.0   | 10.0  |

|             |                        |       |       |
|-------------|------------------------|-------|-------|
| CCARM 12005 | FAHHIFRGIVHVGKTIHRLVTG | 4.0   | 10.0  |
| CCARM 12035 | FAHHIFRGIVHVGKTIHRLVTG | 4.0   | 10.0  |
| CCARM 12037 | FAHHIFRGIVHVGKTIHRLVTG | 4.0   | 10.0  |
| ATCC 19606  | FAKGIAGMAGKLF          | 200.0 | 262.1 |
| NA          | FALGAVTKRLPSLFLITRKC   | 4.0   | 9.4   |
| ATCC 19606  | FASGIAGMAGKLF          | 200.0 | 253.9 |
| ATCC 19606  | FFFLRRIF               | 100.0 | 114.5 |
| ATCC 19606  | FFFLSRIF               | 100.0 | 107.6 |
| ATCC 19606  | FFGRLKSVWSAVKHGWKAASR  | 4.2   | 10.8  |
| CCARM 12036 | FFHHIARGIVHVGKTIHRLVTG | 4.0   | 10.0  |
| CCARM 12005 | FFHHIARGIVHVGKTIHRLVTG | 4.0   | 10.0  |
| CCARM 12035 | FFHHIARGIVHVGKTIHRLVTG | 4.0   | 10.0  |
| CCARM 12037 | FFHHIARGIVHVGKTIHRLVTG | 4.0   | 10.0  |
| CCARM 12036 | FFHHIFRGIKHVGKTIHRLVTG | 2.0   | 5.2   |
| CCARM 12005 | FFHHIFRGIKHVGKTIHRLVTG | 2.0   | 5.2   |
| CCARM 12035 | FFHHIFRGIKHVGKTIHRLVTG | 2.0   | 5.2   |
| CCARM 12037 | FFHHIFRGIKHVGKTIHRLVTG | 2.0   | 5.2   |
| NA          | FFHHIFRGIVHKGKTIHRLVTG | 1.5   | 3.9   |
| ATCC 19606  | FFHHIFRGIVHKGKTIHRLVTG | 3.0   | 7.8   |
| ATCC 17978  | FFHHIFRGIVHKGKTIHRLVTG | 3.0   | 7.8   |
| ATCC 19606  | FFHHIFRGKVHVGKTIHRLVTG | 1.5   | 3.9   |
| ATCC 17978  | FFHHIFRGKVHVGKTIHRLVTG | 3.0   | 7.8   |
| NA          | FFHHIFRGKVHVGKTIHRLVTG | 6.0   | 15.5  |
| ATCC 19606  | FFHHIFRPIVHVGKTIHRLVTG | 5.9   | 15.4  |
| ATCC 17978  | FFHHIFRPIVHVGKTIHRLVTG | 5.9   | 15.4  |
| NA          | FFHHIFRPIVHVGKTIHRLVTG | 5.9   | 15.4  |
| CCARM 12036 | FFHHIKRGIKHVGKTIHRLVTG | 4.0   | 10.3  |
| CCARM 12005 | FFHHIKRGIKHVGKTIHRLVTG | 4.0   | 10.3  |
| CCARM 12035 | FFHHIKRGIKHVGKTIHRLVTG | 4.0   | 10.3  |
| CCARM 12037 | FFHHIKRGIKHVGKTIHRLVTG | 4.0   | 10.3  |
| CCARM 12036 | FFHHIKRGIVHVGKTIHRLVTG | 4.0   | 10.2  |
| CCARM 12005 | FFHHIKRGIVHVGKTIHRLVTG | 4.0   | 10.2  |
| CCARM 12035 | FFHHIKRGIVHVGKTIHRLVTG | 4.0   | 10.2  |
| CCARM 12037 | FFHHIKRGIVHVGKTIHRLVTG | 4.0   | 10.2  |
| NA          | FFPVIGRILNGIL          | 6.0   | 8.8   |
| CCARM 12036 | FKHHIFRGIKHVGKTIHRLVTG | 2.0   | 5.2   |
| CCARM 12005 | FKHHIFRGIKHVGKTIHRLVTG | 2.0   | 5.2   |
| CCARM 12035 | FKHHIFRGIKHVGKTIHRLVTG | 2.0   | 5.2   |
| CCARM 12037 | FKHHIFRGIKHVGKTIHRLVTG | 2.0   | 5.2   |

|             |                            |       |       |
|-------------|----------------------------|-------|-------|
| CCARM 12036 | FKHHIFRGIVHVGKTIHRLVTG     | 2.0   | 5.1   |
| CCARM 12005 | FKHHIFRGIVHVGKTIHRLVTG     | 2.0   | 5.1   |
| CCARM 12035 | FKHHIFRGIVHVGKTIHRLVTG     | 2.0   | 5.1   |
| CCARM 12037 | FKHHIFRGIVHVGKTIHRLVTG     | 2.0   | 5.1   |
| ATCC 19606  | FLFSLIPSAIGGLISAFK         | 20.0  | 37.6  |
| ATCC 15308  | FLGGLIKIVPAMICAVRKKC       | 115.7 | 250.0 |
| SR 201346   | FLGGLIKIVPAMICAVTKKCHHHHHH | 10.9  | 32.0  |
| NA          | FLGGLIKIVPAMICAVTKKCHHHHHH | 21.9  | 64.0  |
| ATCC 15308  | FLGGLIKVPAMICAVRKKC        | 116.6 | 250.0 |
| ATCC 15308  | FLGGLIKPWWPWRR             | 69.0  | 125.0 |
| ATCC 15308  | FLGGLIKRPPAMICAVRKKC       | 113.5 | 250.0 |
| ATCC 15308  | FLGGLIKRVPAMICAVRKKC       | 113.4 | 250.0 |
| ATCC 15308  | FLGGLIKWKWPWWPWRR          | 13.5  | 31.3  |
| ATCC 15308  | FLGGLIKWPWWPWRR            | 31.3  | 62.5  |
| ATCC 15308  | FLGGLIKWWPWRR              | 18.2  | 31.3  |
| ATCC 19606  | FLKGIKGMKGKLF              | 25.0  | 36.3  |
| ATCC 19606  | FLKGIKGMKGKLL              | 25.0  | 35.4  |
| ATCC 19606  | FLKGIVGKLGKLF              | 25.0  | 35.5  |
| ATCC 19606  | FLKGIVGMLGKLF              | 3.0   | 4.3   |
| ATCC 19606  | FLKGIVGMLGKLL              | 6.0   | 8.3   |
| ATCC 19606  | FLKGIVGMLGKLW              | 6.0   | 8.8   |
| NA          | FLPAALAGIGGILGKLF          | 15.8  | 26.2  |
| ATCC 19606  | FLPAALAGIGGILGKLF          | 25.0  | 41.5  |
| NA          | FLPLIGRVLSGIL              | 24.0  | 33.5  |
| ATCC 19606  | FLPWFSKFLGRIL              | 12.0  | 19.5  |
| ATCC 19606  | FLSGIVGMLGKLF              | 6.0   | 8.3   |
| ATCC 19606  | FLSLIPHIVSGVASIAKHF        | 6.3   | 12.7  |
| ATCC 19606  | FLSLIPHIVSGVASLAIHF        | 200.0 | 404.3 |
| ATCC 19606  | FLSLIPHIVSGVASLAKHF        | 6.3   | 12.7  |
| ATCC 19606  | FLSMIPHIVSGVAALAKHL        | 6.3   | 12.5  |
| ATCC 19606  | FSFLSRIF                   | 100.0 | 101.6 |
| NA          | FSTKTRNWFSEHFKKVKEKLDTF    | 80.6  | 250.0 |
| ATCC 19606  | FVPWFSKFLGRIL              | 12.5  | 20.1  |
| ATCC 19606  | FVPWFSKFLKRIL              | 3.1   | 5.3   |
| ATCC 19606  | FVPWFSKFLPRIL              | 50.0  | 82.5  |
| ATCC 19606  | FVPWFSKFLWRIL              | 3.1   | 5.4   |
| ATCC 19606  | FVQWFSKFLGKIL              | 6.0   | 9.7   |
| ATCC 19606  | FVQWFSKFLGRIL              | 6.0   | 9.8   |
| ATCC 19606  | FVQWFSKFLLRIL              | 48.0  | 81.5  |

|            |                                          |       |       |
|------------|------------------------------------------|-------|-------|
| ATCC 19606 | FVQWFSRFLGRIL                            | 6.0   | 10.0  |
| ATCC 19606 | FVRWFSKFLGRIL                            | 6.0   | 10.0  |
| ATCC 19606 | FVRWFSRFLGRIL                            | 6.0   | 10.2  |
| NA         | FWGKLWEGVKNAI                            | 38.0  | 58.8  |
| ATCC 19606 | GCKKYRRFRWKFKGKFWFW                      | 24.1  | 64.0  |
| ATCC 19606 | GCKKYRRFRWKFKGKFWFWGG                    | 23.1  | 64.0  |
| ATCC 19606 | GCRALCYKQRCVTYCRGA                       | 8.0   | 16.4  |
| ATCC 19606 | GCRRFKKFKKWRYRGRFWFWCFG                  | 20.3  | 64.0  |
| ATCC 19606 | GCRRLCYKQRCVTYCRGPPR                     | 1.0   | 2.4   |
| ATCC 19606 | GCRRLCYKQRCVTYCRGR                       | 1.0   | 2.2   |
| ATCC 19606 | GCRRWKKFRWRYRGKFWFWCG                    | 22.0  | 64.0  |
| ATCC 19606 | GFCWYVCVYRNGVRVCYRRCN                    | 0.2   | 0.5   |
| NM8        | GFGSLLGKALRLGANVL                        | 3.0   | 5.1   |
| NA         | GFGSLLGKALRLGANVL                        | 3.1   | 5.2   |
| ATCC 19606 | GFGSLLGKALRLGANVL                        | 4.7   | 8.0   |
| NA         | GFLGPLLKLGLKGVAKVLPHLIPSRQQ              | 12.5  | 36.0  |
| NM8        | GFLGPLLKLGLKGVAKVLPHLIPSRQQ              | 12.5  | 36.0  |
| NM8        | GFLGSLLKTGLKVGSNLL                       | 6.0   | 10.9  |
| NM8        | GFSSIFRGVAKFASKGLGKDLAKLGVDLVA           | 50.0  | 152.6 |
| NM8        | GFSSIFRGVAKFASKGLGKDLAKLGVDLVACKISKQC    | 6.0   | 23.1  |
| NM8        | GFSSIFRGVAKFASKGLGKDLAKLGVDLVASKISKQS    | 12.5  | 47.6  |
| NM35       | GFSSIFRGVAKFASKGLGKKLAKLGVKLVACKISKQC    | 1.5   | 5.8   |
| NM8        | GFSSIFRGVAKFASKGLGKKLAKLGVKLVACKISKQC    | 3.0   | 11.6  |
| NA         | GFWGKLWEGVKNAI                           | 7.0   | 11.2  |
| NA         | GFWSSALEGLKKFAKGGLEALTNP                 | 12.5  | 33.1  |
| NM8        | GFWSSALEGLKKFAKGGLEALTNP                 | 12.5  | 33.1  |
| AB3        | GGLKKLGKKLEGAGKRVFKASEKALPVVVGIIAIGK     | 0.3   | 1.0   |
| AB1        | GGLKKLGKKLEGAGKRVFKASEKALPVVVGIIAIGK     | 0.5   | 2.0   |
| ATCC 17978 | GGLKKLGKKLEGAGKRVFKASEKALPVVVGIIAIGK     | 0.5   | 2.0   |
| ATCC 17978 | GGLKKLGKKLEGAGKRVFNAAEKALPVVAGAKALRK     | 0.5   | 2.0   |
| NM35       | GIFPIFAKLLGKVIKVASSLISKGRTE              | 10.0  | 28.7  |
| NA         | GIFPIFAKLLGKVIKVASSLISKGRTE              | 20.0  | 57.5  |
| NM8        | GIFPIFAKLLGKVIKVASSLISKGRTE              | 20.0  | 57.5  |
| NA         | GIGAVLKVLTGTPALISWIKRKRQQ                | 4.2   | 12.1  |
| NA         | GIGDPVTCLKSGAICHPVFCPRRYKQIGTCGLPGTKCCKP | 29.5  | 128.0 |
| ATCC 19606 | GIGK                                     | 100.0 | 37.3  |
| ATCC 19606 | GIGKFLHSAGKFGKAFVGEIMKS                  | 26.6  | 64.0  |
| ATCC 19606 | GIGKFLHSAGKFGKAFVGEIMNS                  | 20.0  | 49.3  |
| NA         | GILKTIKSIASKLKRKAK                       | 1.6   | 3.1   |

|            |                                                     |      |      |
|------------|-----------------------------------------------------|------|------|
| NA         | GILKTIKSIASKVANTVQKLKRKAKNAV                        | 3.1  | 9.3  |
| NA         | GILKTIKSIASKVANTVQKLKRKAKNAVA                       | 3.1  | 9.5  |
| NA         | GILNTIKSIASKLKRKAK                                  | 1.6  | 3.1  |
| NA         | GIWDTIKSMGKVFAGAILQNL                               | 12.5 | 28.3 |
| NA         | GIWDTIKSMGKVFAGLILQNL                               | 25.0 | 57.6 |
| NM109      | GIWKTIKSMGKVFAGAIKQNL                               | 3.0  | 6.9  |
| NM8        | GIWKTIKSMGKVFAGAIKQNL                               | 3.0  | 6.9  |
| NM75       | GIWKTIKSMGKVFAGAIKQNL                               | 3.0  | 6.9  |
| NM35       | GIWKTIKSMGKVFAGAIKQNL                               | 3.0  | 6.9  |
| NM124      | GIWKTIKSMGKVFAGAIKQNL                               | 3.0  | 6.9  |
| NA         | GIWKTIKSMGKVFAGAIKQNL                               | 6.3  | 14.3 |
| NA         | GIWKTIKSMGKVFAGAILQNL                               | 12.5 | 28.4 |
| NM75       | GIWKTIKSMGKVFAGKIKQNL                               | 3.0  | 7.0  |
| NM109      | GIWKTIKSMGKVFAGKIKQNL                               | 6.0  | 14.1 |
| NM8        | GIWKTIKSMGKVFAGKIKQNL                               | 6.0  | 14.1 |
| NM35       | GIWKTIKSMGKVFAGKIKQNL                               | 6.0  | 14.1 |
| NM124      | GIWKTIKSMGKVFAGKIKQNL                               | 6.0  | 14.1 |
| NA         | GIWKTIKSMGKVFAGKIKQNL                               | 6.3  | 14.7 |
| NM109      | GIWKTIKSMGKVFAGKILQNL                               | 1.5  | 3.5  |
| NM124      | GIWKTIKSMGKVFAGKILQNL                               | 1.5  | 3.5  |
| NM8        | GIWKTIKSMGKVFAGKILQNL                               | 3.0  | 7.0  |
| NM75       | GIWKTIKSMGKVFAGKILQNL                               | 3.0  | 7.0  |
| NM35       | GIWKTIKSMGKVFAGKILQNL                               | 3.0  | 7.0  |
| NA         | GIWKTIKSMGKVFAGKILQNL                               | 6.9  | 16.0 |
| NA         | GIWSSIKNLASKAWNSDIGQSLRNKAAGAINKFVADKIGVTP<br>SQAAS | 5.0  | 24.4 |
| ATCC 19606 | GKKYRRFRWKFKGKWFWWFG                                | 6.1  | 16.0 |
| ATCC 19606 | GKKYRRFRWKFRKGRFWFWG                                | 5.7  | 16.0 |
| ATCC 19606 | GKKYRRFWKFKGKWFWWFG                                 | 6.1  | 16.0 |
| ATCC 17978 | GKLTDKLKRGAKKALNVASKVAPIVAAGASIAR                   | 0.9  | 3.0  |
| NA         | GLASTIGSLLGKFAKGGAQAFLQPK                           | 25.0 | 61.5 |
| NM8        | GLASTIGSLLGKFAKGGAQAFLQPK                           | 25.0 | 61.5 |
| ATCC 15308 | GLFDIWAWWRWRR                                       | 16.9 | 31.3 |
| ATCC 15308 | GLFDIWKKLRWRR                                       | 17.6 | 31.3 |
| ATCC 15308 | GLFDIWKKWRWRR                                       | 16.9 | 31.3 |
| ATCC 15308 | GLFDIWKWWRWRR                                       | 8.2  | 15.6 |
| ATCC 15308 | GLFDKWAWWRWRR                                       | 33.5 | 62.5 |
| NA         | GLFKKLRRKIKKGFKKIFKRL                               | 3.8  | 10.0 |
| ATCC 9955  | GLFKKLRRKIKKGFKKIFKRL                               | 15.9 | 42.0 |

|             |                                      |       |       |
|-------------|--------------------------------------|-------|-------|
| ATCC 9955   | GLFKKLRRKIKKGFKKIFKRLPPIGVGVSIPLAGKR | 1.3   | 5.2   |
| NA          | GLFKKLRRKIKKGFKKIFKRLPPIGVGVSIPLAGKR | 1.3   | 5.2   |
| NM8         | GLGKDLAKLGVDLVACKISKQC               | 200.0 | 452.0 |
| NM35        | GLGKDLAKLGVDLVACKISKQC               | 200.0 | 452.0 |
| NA          | GLGSLLGKAFKIGLKTVGKMMGGAPREQ         | 4.0   | 11.4  |
| NA          | GLGSVLGKALKIGANLL                    | 4.0   | 6.5   |
| NM8         | GLGSVLGKALKIGANLL                    | 6.0   | 9.7   |
| NM8         | GLKEIFKAGLSLVKGIAAHVAS               | 5.0   | 11.3  |
| NM35        | GLKEIFKAGLSLVKGIAAHVAS               | 10.0  | 22.7  |
| NM8         | GLKKIFKAGLSLKKGIAAHVAS               | 20.0  | 45.9  |
| NM35        | GLKKIFKAGLSLKKGIAAHVAS               | 20.0  | 45.9  |
| NM75        | GLKKIFKAGLSLVKGIAAHVAS               | 2.5   | 5.7   |
| NM35        | GLKKIFKAGLSLVKGIAAHVAS               | 20.0  | 45.3  |
| NM8         | GLKKIFKAGLSLVKGIAAHVAS               | 40.0  | 90.6  |
| NM75        | GLKKIFKAGLSLVKGIAHAVAS               | 5.0   | 11.6  |
| NM8         | GLKKIFKAGLSLVKGIAHAVAS               | 10.0  | 23.2  |
| NM124       | GLKKIFKAGLSLVKGIAHAVAS               | 20.0  | 46.5  |
| NM75        | GLKKIFKKGLSLVKGIAAHVAS               | 2.5   | 5.8   |
| NM8         | GLKKIFKKGLSLVKGIAAHVAS               | 5.0   | 11.6  |
| NM35        | GLKKIFKKGLSLVKGIAAHVAS               | 10.0  | 23.2  |
| NA          | GLLKPLLKIAAKVGSNLL                   | 1.6   | 3.0   |
| KCTC 2508   | GLNALKKVFQGIHEAIKKINNHVQ             | 2.0   | 5.4   |
| CCARM 12036 | GLNALKKVFQGIHEAIKKINNHVQ             | 4.0   | 10.8  |
| CCARM 12035 | GLNALKKVFQGIHEAIKKINNHVQ             | 4.0   | 10.8  |
| CCARM 12036 | GLNALKKVFQGIHKAIKKINNHVQ             | 2.0   | 5.4   |
| CCARM 12035 | GLNALKKVFQGIHKAIKKINNHVQ             | 2.0   | 5.4   |
| KCTC 2508   | GLNALKKVFQGIHKAIKKINNHVQ             | 2.0   | 5.4   |
| CCARM 12036 | GLNALKKVFQPIHEAIKKINNHVQ             | 16.0  | 43.8  |
| CCARM 12035 | GLNALKKVFQPIHEAIKKINNHVQ             | 16.0  | 43.8  |
| KCTC 2508   | GLNALKKVFQPIHEAIKKINNHVQ             | 16.0  | 43.8  |
| CCARM 12036 | GLNALKKVFQPIHEAIKLINNHVQ             | 8.0   | 21.8  |
| CCARM 12035 | GLNALKKVFQPIHEAIKLINNHVQ             | 8.0   | 21.8  |
| KCTC 2508   | GLNALKKVFQPIHEAIKLINNHVQ             | 8.0   | 21.8  |
| CCARM 12036 | GLNALKKVFQPIHKAIKKINNHVQ             | 8.0   | 21.9  |
| KCTC 2508   | GLNALKKVFQPIHKAIKKINNHVQ             | 8.0   | 21.9  |
| CCARM 12035 | GLNALKKVFQPIHKAIKKINNHVQ             | 16.0  | 43.8  |
| NA          | GLVGTLLGHIGKAILG                     | 62.5  | 94.9  |
| NM124       | GLVGTLLGHIGKAILG                     | 250.0 | 379.7 |
| NM75        | GLVGTLLGHIGKAILG                     | 250.0 | 379.7 |



|            |                                       |       |       |
|------------|---------------------------------------|-------|-------|
| NM8        | GLVGTLLGHIGKAILG                      | 250.0 | 379.7 |
| NM35       | GLVGTLLGHIGKAILG                      | 250.0 | 379.7 |
| NM109      | GLVGTLLGHIGKAILG                      | 250.0 | 379.7 |
| NA         | GLVGTLLGHIGKAILS                      | 62.5  | 96.8  |
| NM75       | GLVGTLLGHIGKAILS                      | 62.5  | 96.8  |
| NM124      | GLVGTLLGHIGKAILS                      | 125.0 | 193.6 |
| NM8        | GLVGTLLGHIGKAILS                      | 125.0 | 193.6 |
| NM35       | GLVGTLLGHIGKAILS                      | 125.0 | 193.6 |
| NM109      | GLVGTLLGHIGKAILS                      | 125.0 | 193.6 |
| NA         | GMASKAGSVLGKVAKVALKAAL                | 4.0   | 8.3   |
| NM8        | GMATKAGTALGKVAKAVIGAAL                | 25.0  | 50.0  |
| ATCC 19606 | GRKKRRQRRRGWMMVWTLNRD                 | 2.8   | 8.0   |
| NA         | GRKKRRQRRRGWMMVWTLNRD                 | 5.7   | 16.0  |
| NA         | GRLRNLIKAGQNIRGKIQGIGRRIKDILKNLQPRPQV | 1.1   | 4.7   |
| ATCC 19606 | GRRYKKFRWKFGRWFWFG                    | 6.1   | 16.0  |
| Q13        | GTAWRWHYRARS                          | 82.8  | 128.0 |
| Q12        | GTAWRWHYRARS                          | 82.8  | 128.0 |
| NM8        | GVIKSVLKGVAKTVALGML                   | 6.0   | 11.3  |
| NM35       | GVIKSVLKGVAKTVALGML                   | 6.0   | 11.3  |
| NM109      | GVIKSVLKGVAKTVALGML                   | 12.5  | 23.6  |
| NM75       | GVIKSVLKGVAKTVALGML                   | 12.5  | 23.6  |
| NM124      | GVIKSVLKGVAKTVALGML                   | 12.5  | 23.6  |
| NA         | GWANTLKNVAGGLCKITGAA                  | 19.3  | 37.5  |
| NA         | GWFKKAWRKVKNAGRRVLKGVGIHYGVGLI        | 2.4   | 8.0   |
| Q13        | HLRRINKLLTRIGLYRHAFG                  | 3.3   | 8.0   |
| NA         | HLRRINKLLTRIGLYRHAFG                  | 26.3  | 64.0  |
| NA         | IASKVANTVQKLKRKAKNAV                  | 50.0  | 108.4 |
| NA         | IASKVANTVQKLKRKAKNAVA                 | 6.3   | 14.0  |
| ATCC 19606 | IDWKKVDWKKVSKKTCKVMLKACKFLG           | 0.0   | 0.1   |
| NM35       | IKIPSFERNILKKVGKEAVSLIAGALKQS         | 5.0   | 15.8  |
| NM8        | IKIPSFERNILKKVGKEAVSLIAGALKQS         | 10.0  | 31.6  |
| NA         | IKLSKETKDNLKKVLKGAIKGAIIVAKMV         | 6.3   | 19.3  |
| NA         | IKLSKETKKNLKKVLKGAIKGAIIVAKMV         | 3.1   | 9.6   |
| NA         | IKLSKKTKNLKKVLKGAIKGAIIVAKMV          | 3.1   | 9.6   |
| NA         | IKLSPETKDNLKKVLKGAIKGAIIVAKMV         | 6.3   | 19.2  |
| NA         | IKLSPETKKNLKKVLKGAIKGAIIVAKMV         | 3.1   | 9.5   |
| NA         | IKLSPKTKDNLKKVLKGAIKGAIIVAKMV         | 3.1   | 9.5   |
| NA         | IKLSPKTKKNLKKVLKGAIKGAIIVAKMV         | 3.1   | 9.5   |
| NA         | IKSIASKVANTVQKLKRKAKNAV               | 6.3   | 15.6  |

|             |                                                     |       |       |
|-------------|-----------------------------------------------------|-------|-------|
| NA          | IKSIASKVANTVQKLKRKAKNAVA                            | 3.1   | 8.0   |
| NM8         | ILGAILPLVSGLLSNKL                                   | 128.0 | 220.3 |
| NM8         | ILGKLLKTAAGLLSNL                                    | 64.0  | 104.0 |
| NM8         | ILGKLLKTAAKLLSNL                                    | 4.0   | 6.8   |
| NM8         | ILGKLLSTAAGLLKNL                                    | 32.0  | 52.0  |
| NM8         | ILGKLLSTAAGLLSKL                                    | 128.0 | 204.5 |
| NM8         | ILGKLLSTAAGLLSNL                                    | 64.0  | 101.4 |
| NM8         | ILGKLLSTAALKLLSNL                                   | 8.0   | 13.2  |
| NA          | ILSAIWSGIKSLF                                       | 10.0  | 14.3  |
| NA          | INLKAIAALAKKLF                                      | 3.7   | 5.7   |
| ATCC 19606  | ISKRILTGKK                                          | 223.9 | 256.0 |
| ATCC 15308  | ISLNPPRSTIAMRAINNYRWSKNQNTFLR                       | 3.5   | 12.7  |
| NA          | IWSAIWSGIKGLL                                       | 14.0  | 20.2  |
| ATCC 19606  | KAAAKWAAKAAK                                        | 100.0 | 121.4 |
| ATCC 19606  | KAK                                                 | 100.0 | 34.5  |
| ATCC 19606  | KCRRLCYRQRCVITYCRGR                                 | 1.0   | 2.3   |
| ATCC 19606  | KCRRYCYRQRCVITYCRGR                                 | 1.0   | 2.4   |
| ATCC 15308  | KESRAKKFQRQHMDSDSSPSSSTYSNQMMRRRNMTQGRSK<br>PVNTFVH | 9.0   | 50.7  |
| NM124       | KFASKGLGKDLAKLGVDLVACKISKQC                         | 100.0 | 282.1 |
| NM8         | KFASKGLGKDLAKLGVDLVACKISKQC                         | 200.0 | 564.3 |
| NA          | KFFKRLLKSVRRRAVKKFRKKPRLIGLSTLL                     | 55.1  | 200.0 |
| ATCC 19606  | KFHEKHHSRGY                                         | 20.5  | 32.0  |
| CCARM 12036 | KFHFIHFRGIKHVGKTIHRLVTG                             | 2.0   | 5.2   |
| CCARM 12005 | KFHFIHFRGIKHVGKTIHRLVTG                             | 2.0   | 5.2   |
| CCARM 12035 | KFHFIHFRGIKHVGKTIHRLVTG                             | 2.0   | 5.2   |
| CCARM 12037 | KFHFIHFRGIKHVGKTIHRLVTG                             | 2.0   | 5.2   |
| CCARM 12036 | KFHFIHFRGIVHVGKTIHRLVTG                             | 2.0   | 5.1   |
| CCARM 12005 | KFHFIHFRGIVHVGKTIHRLVTG                             | 2.0   | 5.1   |
| CCARM 12035 | KFHFIHFRGIVHVGKTIHRLVTG                             | 2.0   | 5.1   |
| CCARM 12037 | KFHFIHFRGIVHVGKTIHRLVTG                             | 2.0   | 5.1   |
| Q12         | KFVRLKIYCRDKNKGRGISF                                | 26.3  | 64.0  |
| Q13         | KFVRLKIYCRDKNKGRGISF                                | 52.7  | 128.0 |
| ATCC 19606  | KFWKLLKKALRLWAKVL                                   | 3.7   | 8.0   |
| NA          | KFWKLLKKALRLWAKVL                                   | 7.5   | 16.0  |
| ATCC 19606  | KFWKLLKKALRLWKKVL                                   | 3.6   | 8.0   |
| NA          | KFWKLLKKALRLWKKVL                                   | 3.6   | 8.0   |
| ATCC 19606  | KFWSLLKKALRLWANVL                                   | 3.8   | 8.0   |
| NA          | KFWSLLKKALRLWANVL                                   | 3.8   | 8.0   |

|            |                                   |       |       |
|------------|-----------------------------------|-------|-------|
| ATCC 19606 | KGGGKWGGKGGK                      | 25.0  | 27.9  |
| ATCC 19606 | KGGK                              | 12.5  | 4.9   |
| ATCC 19606 | KGIVGMLGKLF                       | 50.0  | 58.1  |
| NM8        | KGLGKDLAKLGVDLVACKISKQC           | 200.0 | 477.6 |
| ATCC 19606 | KIAKVALKALKIAKGALKAL              | 1.5   | 3.1   |
| NA         | KIAKVALKALKIAKGALKAL              | 1.5   | 3.1   |
| ATCC 19606 | KIAKVALKALKIAKVALKAL              | 1.5   | 3.1   |
| NA         | KIAKVALKALKIAKVALKAL              | 1.5   | 3.1   |
| NA         | KIKKGFKKIFKRLPPIGVGVSIPLAGKR      | 3.3   | 10.0  |
| ATCC 9955  | KIKKGFKKIFKRLPPIGVGVSIPLAGKR      | 9.1   | 28.0  |
| ATCC 19606 | KILGVSKKIMRRISKDILTGKK            | 6.4   | 16.0  |
| ATCC 19606 | KILRGVSKKIMRRILTGKK               | 0.9   | 2.0   |
| ATCC 19606 | KILRGVSKKIMRRISKDILTGKK           | 3.0   | 8.0   |
| ATCC 19606 | KILRGVSKKIMRTFLRR                 | 3.8   | 8.0   |
| ATCC 19606 | KILRGVSKRILTGKK                   | 75.4  | 128.0 |
| ATCC 19606 | KISKKIMRTFLRR                     | 152.6 | 256.0 |
| ATCC 19606 | KISKKIMRTFLRRILTGKK               | 1.7   | 4.0   |
| ATCC 19606 | KISKKIMRTFLRRISKDILTGKK           | 1.4   | 4.0   |
| ATCC 19606 | KK                                | 75.0  | 20.6  |
| NA         | KKCGFFCKLKNKLKSTGSRSNIAAGTHGGTFRV | 56.4  | 200.0 |
| NA         | KKCKFFCKVKKKIKSIGFIPIVSIPFK       | 60.9  | 200.0 |
| ATCC 19606 | KKEK                              | 37.0  | 19.7  |
| ATCC 19606 | KKIMRTFLRR                        | 94.9  | 128.0 |
| ATCC 19606 | KKIMRTFLRRISKDILTGKK              | 3.3   | 8.0   |
| ATCC 19606 | KKIMRTFLRRISKILTGGK               | 3.3   | 8.0   |
| ATCC 19606 | KKKK                              | 12.5  | 6.6   |
| ATCC 19606 | KKKLKKLKKKLK                      | 50.0  | 75.6  |
| ATCC 19606 | KKKLLLLLLLLLKKK                   | 50.0  | 90.3  |
| ATCC 19606 | KKLLKKLKKLLK                      | 19.0  | 28.1  |
| ATCC 19606 | KKLLKLLKLLK                       | 4.5   | 6.5   |
| NA         | KKRLKKIFKKPMVIGVTIPF              | 1.7   | 4.0   |
| NA         | KKWRKLLKKLKLL                     | 0.5   | 1.0   |
| NA         | KKWRKLLKWLAKK                     | 1.3   | 2.3   |
| NA         | KKWRWWLKALAKK                     | 2.3   | 4.0   |
| NA         | KKWRWWLKALAKLL                    | 0.2   | 0.4   |
| ATCC 19606 | KLAKLAKKLAKLAK                    | 196.9 | 300.0 |
| ATCC 19606 | KLK                               | 100.0 | 38.8  |
| ATCC 19606 | KLKLLKLLKLLKLLK                   | 15.0  | 27.1  |
| ATCC 899   | KLKSLKTLKAKKKKLTLLKALSK           | 0.3   | 0.9   |

|            |                                               |       |       |
|------------|-----------------------------------------------|-------|-------|
| ATCC 821   | KLKSLKTLKAKKKKLKTLKALSK                       | 0.3   | 0.9   |
| ATCC 985   | KLKSLKTLKAKKKKLKTLKALSK                       | 0.3   | 0.9   |
| ATCC 1012  | KLKSLKTLKAKKKKLKTLKALSK                       | 0.3   | 0.9   |
| ATCC 884   | KLKSLKTLKAKKKKLKTLKALSK                       | 0.3   | 0.9   |
| ATCC 689   | KLKSLKTLKAKKKKLKTLKALSK                       | 0.3   | 0.9   |
| ATCC 649   | KLKSLKTLKAKKKKLKTLKALSK                       | 0.3   | 0.9   |
| ATCC 19606 | KLKSLKTLKAKKKKLKTLKALSK                       | 0.7   | 2.1   |
| ATCC 17978 | KLKSLKTLKAKKKKLKTLKALSK                       | 0.7   | 2.1   |
| ATCC 964   | KLKSLKTLKAKKKKLKTLKALSK                       | 0.7   | 2.1   |
| ATCC 759   | KLKSLKTLKAKKKKLKTLKALSK                       | 0.7   | 2.1   |
| ATCC 821   | KLKSLKTLKAKKKLKTALKALSK                       | 0.3   | 0.9   |
| ATCC 985   | KLKSLKTLKAKKKLKTALKALSK                       | 0.3   | 0.9   |
| ATCC 759   | KLKSLKTLKAKKKLKTALKALSK                       | 0.3   | 0.9   |
| ATCC 649   | KLKSLKTLKAKKKLKTALKALSK                       | 0.3   | 0.9   |
| ATCC 19606 | KLKSLKTLKAKKKLKTALKALSK                       | 0.7   | 2.0   |
| ATCC 17978 | KLKSLKTLKAKKKLKTALKALSK                       | 0.7   | 2.0   |
| ATCC 964   | KLKSLKTLKAKKKLKTALKALSK                       | 0.7   | 2.0   |
| ATCC 899   | KLKSLKTLKAKKKLKTALKALSK                       | 0.7   | 2.0   |
| ATCC 1012  | KLKSLKTLKAKKKLKTALKALSK                       | 0.7   | 2.0   |
| ATCC 884   | KLKSLKTLKAKKKLKTALKALSK                       | 0.7   | 2.0   |
| ATCC 689   | KLKSLKTLKAKKKLKTALKALSK                       | 0.7   | 2.0   |
| NA         | KLLK                                          | 127.8 | 64.0  |
| ATCC 19606 | KLLKWLLKLLK                                   | 100.0 | 150.9 |
| ATCC 19606 | KNLRRIRKIIHIKKYG                              | 2.6   | 5.9   |
| ATCC 15308 | KPKDMTSSQWFKTQHVQPSPQASNSAMSIINKYTERSKDLNTFLH | 10.0  | 52.1  |
| ATCC 15308 | KPKGMTSSQWFKIQHMQPSPQASNSAMKNINKHTKRSKDLNTFLH | 1.2   | 6.3   |
| ATCC 15308 | KPPQFTWAQWFETQHINMTSQQSTNAMQVINNYQRRSKNQNTFLL | 10.0  | 54.6  |
| NA         | KRFKKFFKKLKNVKKRAKKFFKKPRVIGVSIPF             | 3.9   | 16.0  |
| NA         | KRFKKFFKKLKNVKKRVKKFFRKPRVIGVTFPF             | 0.3   | 1.1   |
| NA         | KRFKKFFKKVKKSV                                | 71.2  | 128.0 |
| NA         | KRFKKFFKKVKKSVKKRLKKIFKKPMVIGVTIPF            | 0.3   | 1.0   |
| NA         | KRGFGKKLRKRLKKFRNSIKKRLKNFNVVIPIPLPG          | 1.9   | 8.1   |
| ATCC 19606 | KRGFGKKLRKRLKKFRNSIKKRLKNFNVVIPIPLPG          | 3.8   | 16.3  |
| NA         | KRIVQRIKDFLRNLVPRTES                          | 6.5   | 16.0  |
| ATCC 19606 | KRIVQRIKDFLRNLVPRTES                          | 25.9  | 64.0  |
| NA         | KRRGSVTTRYQFLMIHLRPPKKLFA                     | 3.1   | 9.4   |
| ATCC 17978 | KRWWKWIRW                                     | 5.0   | 7.2   |

|            |                                     |       |       |
|------------|-------------------------------------|-------|-------|
| ATCC 17978 | KRWWKWRR                            | 20.0  | 29.8  |
| NA         | KSKEKIGKEFKRIVQRIKDFLRNLPRTES       | 2.2   | 8.0   |
| ATCC 19606 | KSKEKIGKEFKRIVQRIKDFLRNLPRTES       | 4.4   | 16.0  |
| NA         | KTRNWFSEHFKKVKEKLKDTFA              | 90.3  | 250.0 |
| NA         | KVANTVQKLKRKAKNAVA                  | 50.0  | 98.4  |
| ATCC 19606 | KVVVKWVVKVVK                        | 100.0 | 141.1 |
| NA         | KWCFRVCYRGICYRKCR                   | 7.1   | 16.0  |
| ATCC 19606 | KWCFRVCYRGICYRRCR                   | 0.1   | 0.1   |
| ATCC 19606 | KWKIFKKIEKVGRNIRNGIIKAGPAVAVLGEAKAL | 33.5  | 128.0 |
| NA         | KWKLFFKIGIGAVLKVLTG                 | 3.1   | 6.9   |
| KCTC 2508  | KWKLFFKIGIGAVLKVLTG                 | 3.1   | 6.9   |
| NA         | KWKLFFKIGIGKFLHSAKKF                | 3.1   | 7.5   |
| KCTC 2508  | KWKLFFKIGIGKFLHSAKKF                | 12.5  | 30.1  |
| NA         | KWKLFFKIPKFLHLAKKF                  | 5.4   | 12.5  |
| NA         | KWKSFIKKLTKKFLHSAKKF                | 0.6   | 1.6   |
| NA         | KWKSFIKKLTSKFLHSAKKF                | 1.3   | 3.1   |
| ATCC 19606 | KWKSFLKTFKSAVKTVLHTALKAIS           | 0.7   | 2.0   |
| ATCC 17978 | KWKSFLKTFKSAVKTVLHTALKAIS           | 0.7   | 2.0   |
| ATCC 899   | KWKSFLKTFKSAVKTVLHTALKAIS           | 0.7   | 2.0   |
| ATCC 821   | KWKSFLKTFKSAVKTVLHTALKAIS           | 0.7   | 2.0   |
| ATCC 985   | KWKSFLKTFKSAVKTVLHTALKAIS           | 0.7   | 2.0   |
| ATCC 1012  | KWKSFLKTFKSAVKTVLHTALKAIS           | 0.7   | 2.0   |
| ATCC 759   | KWKSFLKTFKSAVKTVLHTALKAIS           | 0.7   | 2.0   |
| ATCC 884   | KWKSFLKTFKSAVKTVLHTALKAIS           | 0.7   | 2.0   |
| ATCC 689   | KWKSFLKTFKSAVKTVLHTALKAIS           | 0.7   | 2.0   |
| ATCC 649   | KWKSFLKTFKSAVKTVLHTALKAIS           | 0.7   | 2.0   |
| ATCC 964   | KWKSFLKTFKSAVKTVLHTALKAIS           | 1.3   | 3.8   |
| ATCC 17978 | KWKSFLKTFKAKKKALKTLLKAISK           | 0.7   | 2.1   |
| ATCC 964   | KWKSFLKTFKAKKKALKTLLKAISK           | 0.7   | 2.1   |
| ATCC 899   | KWKSFLKTFKAKKKALKTLLKAISK           | 0.7   | 2.1   |
| ATCC 821   | KWKSFLKTFKAKKKALKTLLKAISK           | 0.7   | 2.1   |
| ATCC 985   | KWKSFLKTFKAKKKALKTLLKAISK           | 0.7   | 2.1   |
| ATCC 1012  | KWKSFLKTFKAKKKALKTLLKAISK           | 0.7   | 2.1   |
| ATCC 759   | KWKSFLKTFKAKKKALKTLLKAISK           | 0.7   | 2.1   |
| ATCC 884   | KWKSFLKTFKAKKKALKTLLKAISK           | 0.7   | 2.1   |
| ATCC 19606 | KWKSFLKTFKAKKKALKTLLKAISK           | 1.3   | 3.9   |
| ATCC 689   | KWKSFLKTFKAKKKALKTLLKAISK           | 1.3   | 3.9   |
| ATCC 649   | KWKSFLKTFKAKKKALKTLLKAISK           | 1.3   | 3.9   |
| ATCC 19606 | KWKSFLKTFKAKKKKLKTLKAISK            | 0.6   | 1.8   |
| ATCC 899   | KWKSFLKTFKAKKKKLKTLKAISK            | 0.6   | 1.8   |
| ATCC 985   | KWKSFLKTFKAKKKKLKTLKAISK            | 0.6   | 1.8   |
| ATCC 1012  | KWKSFLKTFKAKKKKLKTLKAISK            | 0.6   | 1.8   |
| ATCC 759   | KWKSFLKTFKAKKKKLKTLKAISK            | 0.6   | 1.8   |
| ATCC 884   | KWKSFLKTFKAKKKKLKTLKAISK            | 0.6   | 1.8   |
| ATCC 649   | KWKSFLKTFKAKKKKLKTLKAISK            | 0.6   | 1.8   |
| ATCC 17978 | KWKSFLKTFKAKKKKLKTLKAISK            | 1.2   | 3.7   |
| ATCC 964   | KWKSFLKTFKAKKKKLKTLKAISK            | 1.2   | 3.7   |
| ATCC 821   | KWKSFLKTFKAKKKKLKTLKAISK            | 1.2   | 3.7   |
| ATCC 689   | KWKSFLKTFKAKKKKLKTLKAISK            | 1.2   | 3.7   |
| ATCC 899   | KWKSFLKTFKAKKKVLKTALKAISK           | 0.3   | 0.9   |

|            |                                    |       |       |
|------------|------------------------------------|-------|-------|
| ATCC 759   | KWKSFLKTFSKAKKKVLKTALKAISK         | 0.3   | 0.9   |
| ATCC 884   | KWKSFLKTFSKAKKKVLKTALKAISK         | 0.3   | 0.9   |
| ATCC 649   | KWKSFLKTFSKAKKKVLKTALKAISK         | 0.3   | 0.9   |
| ATCC 19606 | KWKSFLKTFSKAKKKVLKTALKAISK         | 0.7   | 2.1   |
| ATCC 17978 | KWKSFLKTFSKAKKKVLKTALKAISK         | 0.7   | 2.1   |
| ATCC 821   | KWKSFLKTFSKAKKKVLKTALKAISK         | 0.7   | 2.1   |
| ATCC 985   | KWKSFLKTFSKAKKKVLKTALKAISK         | 0.7   | 2.1   |
| ATCC 689   | KWKSFLKTFSKAKKKVLKTALKAISK         | 0.7   | 2.1   |
| ATCC 964   | KWKSFLKTFSKAKKKVLKTALKAISK         | 1.3   | 3.9   |
| ATCC 1012  | KWKSFLKTFSKAKKKVLKTALKAISK         | 1.3   | 3.9   |
| ATCC 19606 | KWLKKWLKWLKK                       | 4.7   | 8.0   |
| NA         | KWWKWWKKWWKK                       | 3.3   | 6.3   |
| ATCC 19606 | LFWKLLKALRLWAKVL                   | 3.8   | 8.0   |
| NA         | LFWKLLKALRLWAKVL                   | 3.8   | 8.0   |
| NA         | LGAWLAGKVAGTVATYAWNRYV             | 25.0  | 59.2  |
| ATCC 19606 | LIRGLFKSFQVF                       | 6.0   | 9.8   |
| NA         | LKAAAAAAKLAAKAAKAAALAAAAAAKL       | 3.2   | 8.1   |
| NA         | LKFLKFG                            | 128.0 | 109.1 |
| NA         | LKLKAIAALAKKKW                     | 5.1   | 8.0   |
| NA         | LKLKSIVSWAKKVL                     | 1.2   | 2.0   |
| NA         | LKLLKKLLKKLLKLL                    | 3.1   | 5.6   |
| ATCC 19606 | LKLLKKLLKKLLKLL                    | 13.0  | 23.5  |
| NA         | LKLSPKTKDTLKKVLKGAIKGAIAIASMA      | 0.6   | 1.8   |
| NA         | LKWLKWG                            | 128.0 | 119.1 |
| NA         | LLKKALRLWKKVL                      | 19.9  | 32.0  |
| ATCC 19606 | LLKKALRLWKKVL                      | 79.5  | 128.0 |
| NA         | LLKKLLKCC                          | 18.4  | 20.0  |
| ATCC 19606 | LLKKLLKLLKLLKK                     | 11.0  | 19.9  |
| ATCC 19606 | LLKLLKKLLKKLLKL                    | 10.0  | 18.1  |
| ATCC 19606 | LLLLKKKKKKLLLL                     | 50.0  | 90.3  |
| ATCC 15308 | LLPWKWPWWKWRR                      | 129.0 | 250.0 |
| ATCC 19606 | LLQWLSKLLGRLL                      | 12.0  | 18.6  |
| ATCC 19606 | LLQWLSKLLGRWL                      | 6.0   | 9.8   |
| ATCC 19606 | LLWKALRLWWKVL                      | 9.3   | 16.0  |
| NA         | LLWKALRLWWKVL                      | 9.3   | 16.0  |
| Q13        | LPRRNRWSKIWKVTVFS                  | 1.7   | 4.0   |
| NA         | LPRRNRWSKIWKVTVFS                  | 9.4   | 22.6  |
| NA         | LRDLVCYCRRGCKRRERMNGTCRKGHLMYTLCCR | 30.1  | 128.0 |
| NA         | LRKLRKRLRLRKLRL                    | 13.5  | 32.0  |
| NA         | LRKLRKRLVRLASHLRKLRL               | 2.1   | 6.0   |
| NA         | LRWLRWG                            | 128.0 | 126.2 |
| ATCC 19606 | LRWTPTSPYPRYPTRSRGSRWSR            | 8.0   | 22.9  |
| NA         | LVQRGRFGRFLKKVRRFIPKVIAAQIGSRFG    | 1.3   | 4.8   |
| ATCC 17978 | NPEKALEKLIQKAIKGMNLGWFTGVGFRRKR    | 4.0   | 15.1  |
| M6337      | NPEKALEKLIQKAIKGMNLGWFTGVGFRRKR    | 4.0   | 15.1  |
| ATCC 19606 | NPEKALEKLIQKAIKGMNLGWFTGVGFRRKR    | 8.0   | 30.2  |
| M105656    | NPEKALEKLIQKAIKGMNLGWFTGVGFRRKR    | 8.0   | 30.2  |
| M2925      | NPEKALEKLIQKAIKGMNLGWFTGVGFRRKR    | 8.0   | 30.2  |
| M3237      | NPEKALEKLIQKAIKGMNLGWFTGVGFRRKR    | 16.0  | 60.3  |
| ATCC 19606 | NPEKALEPLIAIQIAIKGMNLGWFTGVGFRRKR  | 64.0  | 238.4 |
| M3237      | NPEKALEPLIAIQIAIKGMNLGWFTGVGFRRKR  | 64.0  | 238.4 |

|             |                                                                                                                                                   |       |       |
|-------------|---------------------------------------------------------------------------------------------------------------------------------------------------|-------|-------|
| ATCC 17978  | NPEKALEPLIAIQIAIKGMLNGWFTGVGFRRKR                                                                                                                 | 64.0  | 238.4 |
| Q12         | NRFTARFRRTPWRLCLQFRQ                                                                                                                              | 3.0   | 8.0   |
| Q13         | NRFTARFRRTPWRLCLQFRQ                                                                                                                              | 12.1  | 32.0  |
| NA          | NRFTARFRRTPWRLCLQFRQ                                                                                                                              | 17.1  | 45.3  |
| NA          | PPPVIKFNRPFMLMWIVERDTRSILFMGKIVNPKAP                                                                                                              | 60.8  | 250.0 |
| ICU 63169   | PRPGPRP                                                                                                                                           | 165.0 | 128.0 |
| ICU 63169   | PRPLPRP                                                                                                                                           | 153.8 | 128.0 |
| ICU 63169   | PRPRPRP                                                                                                                                           | 146.3 | 128.0 |
| ICU 63169   | PRPWPRP                                                                                                                                           | 141.4 | 128.0 |
| ATCC 15308  | QDGM YQRFLRQH VHP EETGGSDRYSNLMMQRRKMTLYHSK<br>RFNTFIH                                                                                            | 0.5   | 2.9   |
| ATCC 15308  | QDNSRYTHFLTQHYDAKPQGRDDRYSESIMRRRGLTSPSKDI<br>NTFIH                                                                                               | 10.0  | 56.4  |
| AB1         | QKKIRVRLSA                                                                                                                                        | 13.4  | 16.0  |
| AB7         | QKKIRVRLSA                                                                                                                                        | 26.7  | 32.0  |
| Q12         | QVRWWGRYWRRKWATCR                                                                                                                                 | 6.7   | 16.0  |
| Q13         | QVRWWGRYWRRKWATCR                                                                                                                                 | 26.7  | 64.0  |
| NA          | RGGLCYCRGFCVCVGR                                                                                                                                  | 2.1   | 4.0   |
| NM124       | RGVAKFASKGLGKDLAKLGVDLVACKISKQC                                                                                                                   | 50.0  | 160.2 |
| NM8         | RGVAKFASKGLGKDLAKLGVDLVACKISKQC                                                                                                                   | 100.0 | 320.5 |
| NM35        | RGVAKFASKGLGKDLAKLGVDLVACKISKQC                                                                                                                   | 200.0 | 641.0 |
| NA          | RIKRFWPVVIRTVVAGYNLYRAIKKK                                                                                                                        | 0.7   | 2.4   |
| ATCC 19606  | RILRGVSRRIMRRILTGRR                                                                                                                               | 3.4   | 8.0   |
| ATCC 17978  | RKWWRWIKW                                                                                                                                         | 5.0   | 7.2   |
| ATCC 15308  | RLPWRWPWRPWRR                                                                                                                                     | 130.3 | 250.0 |
| AB5075      | RLVRILVSKRPVAIKPYFRL                                                                                                                              | 2.0   | 4.9   |
| ATCC 15308  | RPPQFTRAQWF AIQHISLN                                                                                                                              | 10.0  | 23.1  |
| ATCC 15308  | RPPQFTRAQWF AIQHISLNPPRCTIAMRAINNYRWRCKNQN<br>TFLRTTFANVVNVCGNQSIRCPHNRTLNNCHRSRFRVPLLHC<br>DLINPGAQNISNCTYADRPGRRFYVACDNRDPRDSPRYPVV<br>PVHLDTTI | 0.3   | 4.8   |
| ATCC 15308  | RPPQFTRAQWF AIQHISLNPPRSTIAMRAINNYRWRSKNQNT<br>FL                                                                                                 | 0.3   | 1.6   |
| ATCC 15308  | RPPQFTRAQWF AIQHISLNPPRSTIAMRAINNYRWRSKNQNT<br>FLR                                                                                                | 0.6   | 3.3   |
| NA          | RRGLFKKLRRKIKGFKKIFKRLPPVGVGVSIPLAGRR                                                                                                             | 1.1   | 4.7   |
| NA          | RRIRPRPPRLPRPRPLPFPRPGPRPIRPLPFP                                                                                                                  | 0.5   | 2.1   |
| ATCC 15308  | RRPWRWPWPWR                                                                                                                                       | 125.5 | 250.0 |
| ATCC 15308  | RRPWRWPWPWR                                                                                                                                       | 123.7 | 250.0 |
| ATCC 19606  | RRRRRFRRVIRRIPLPKYLINTE                                                                                                                           | 2.0   | 6.5   |
| ATCC 19606  | RRRRRYRYWRRGLTIQGRPKSLPLNTGD                                                                                                                      | 2.0   | 7.1   |
| NA          | RRSKARGGSRGSKMGRKDSKGSGRPGSGSRPGGGSSIAGA<br>SRGDRGGTRNA                                                                                           | 4.7   | 24.4  |
| AB1         | RRWVRRVRRWVRRVVRVRRWVRR                                                                                                                           | 1.5   | 5.0   |
| AB3         | RRWVRRVRRWVRRVVRVRRWVRR                                                                                                                           | 1.8   | 6.0   |
| AB2         | RRWVRRVRRWVRRVVRVRRWVRR                                                                                                                           | 3.2   | 11.0  |
| Q13         | RSITRPVLVRRRWVRPVF                                                                                                                                | 52.2  | 128.0 |
| Q12         | RSITRPVLVRRRWVRPVF                                                                                                                                | 52.2  | 128.0 |
| NA          | RVRRFWPLVPVAINTVAAGINLYKAIRRK                                                                                                                     | 2.8   | 9.5   |
| NA          | RWKIFKKIEKMGRNIRDGIVKAGPAIEVLGSAKAIGK                                                                                                             | 1.4   | 5.7   |
| CCARM 12035 | RWKIFKKIEKVGRNVRDGIKAGPAVAVVGQAATVVK                                                                                                              | 1.0   | 4.0   |

|             |                                                   |       |       |
|-------------|---------------------------------------------------|-------|-------|
| CCARM 12037 | RWKIFKKIEKVGRNVRDGIIKAGPAVAVVGQAATVVK             | 1.0   | 4.0   |
| CCARM 12036 | RWKIFKKIEKVGRNVRDGIIKAGPAVAVVGQAATVVK             | 1.0   | 4.0   |
| CCARM 12005 | RWKIFKKIEKVGRNVRDGIIKAGPAVAVVGQAATVVK             | 2.0   | 8.0   |
| CCARM 12035 | RWKIFKKIPKFLHSAKKF                                | 2.0   | 4.6   |
| CCARM 12037 | RWKIFKKIPKFLHSAKKF                                | 2.0   | 4.6   |
| CCARM 12036 | RWKIFKKIPKFLHSAKKF                                | 2.0   | 4.6   |
| CCARM 12005 | RWKIFKKIPKFLHSAKKF                                | 2.0   | 4.6   |
| DSM 30007   | RWRWRW                                            | 85.0  | 88.8  |
| AB2         | RWWRWWRWRR                                        | 1.4   | 3.0   |
| AB1         | RWWRWWRWRR                                        | 2.4   | 5.0   |
| NA          | RWWRWWRWRR                                        | 2.7   | 5.6   |
| AB3         | RWWRWWRWRR                                        | 5.3   | 11.0  |
| NA          | SAVGRHGRRFGLRKHRKH                                | 50.0  | 107.8 |
| CICC 22934  | SAVGRHGRRFGLRKHRKH                                | 100.0 | 215.6 |
| CICC 22934  | SAVGRHLRRFGLRKHRKH                                | 100.0 | 221.2 |
| CICC 22934  | SAVGRHLRRFLRKHRKH                                 | 100.0 | 226.8 |
| CICC 22934  | SAVLRHLRRFLRKHRKH                                 | 100.0 | 232.4 |
| Q12         | SIKILKIYFIQGRHWSF                                 | 14.1  | 32.0  |
| Q13         | SIKILKIYFIQGRHWSF                                 | 28.3  | 64.0  |
| CICC 22934  | SKVGRHGRRFGHRAHRKL                                | 100.0 | 215.6 |
| CICC 22934  | SKVGRHLRRFGHRAHRKL                                | 100.0 | 221.2 |
| CICC 22934  | SKVGRHLRRFLHRAHRKL                                | 100.0 | 226.8 |
| CICC 22934  | SKVLRHLRRFLHRAHRKL                                | 100.0 | 232.4 |
| CICC 22934  | SKVWRHWRRFWHRAHRKK                                | 7.8   | 20.0  |
| NA          | SKVWRHWRRFWHRAHRLH                                | 25.0  | 63.8  |
| ATCC 19606  | SMATPHVAGAAALILSKHPTWTNAQVRDRLESTATYLGNSF<br>YYGK | 26.1  | 128.0 |
| SRAC2       | SMATPHVAGAAALILSKHPTWTNAQVRDRLESTATYLGNSF<br>YYGK | 26.1  | 128.0 |
| ATCC 15308  | TIAMRAINNYRWRSKNQNTFLR                            | 1.1   | 3.0   |
| Q12         | TMSLRFWRWKVR                                      | 9.6   | 16.0  |
| Q13         | TMSLRFWRWKVR                                      | 19.2  | 32.0  |
| NA          | TMSLRFWRWKVR                                      | 76.8  | 128.0 |
| NA          | TRWLWLLRGGLKAAGWGIRAHNLNRNQ                       | 65.7  | 200.0 |
| AB5075      | TTSIRRRYQVSLIRRHGKR                               | 1.0   | 2.5   |
| DSM 3008    | TWLKKRRWKKVKPP                                    | 34.6  | 64.0  |
| AB1         | VAKGLIKGVKAKGELPAKGVFKGLKESIGKRAVLKG              | 8.7   | 32.0  |
| ATCC 17978  | VAKGLIKGVKAKGELPAKGVFKGLKESIGKRAVLKG              | 8.7   | 32.0  |
| DSM 30008   | VDKPPYLPRPRPPRIYNR                                | 6.7   | 16.0  |
| ATCC 19606  | VKGSWSKKFEVIA                                     | 1.6   | 2.3   |
| NA          | VKGSWSKKFEVIA                                     | 3.1   | 4.6   |
| Q12         | VLHTGYRKFLHRSKRFFHLR                              | 24.6  | 64.0  |
| Q13         | VLHTGYRKFLHRSKRFFHLR                              | 49.2  | 128.0 |
| NA          | VQLRIRVAVIRA                                      | 23.0  | 32.0  |
| NA          | VQLRIRVCVIRK                                      | 10.8  | 16.0  |
| NA          | VQLRIRVCVIRR                                      | 21.2  | 32.0  |
| NA          | VQWRIRIAVIRA                                      | 10.8  | 16.0  |
| NA          | VQWRIRVAVIRK                                      | 5.2   | 8.0   |
| NA          | VWLSALKFIGKHLAKHQLSKL                             | 3.1   | 7.5   |
| ATCC 19606  | WFKKLLKKALRLWKKVL                                 | 3.6   | 8.0   |
| NA          | WFKKLLKKALRLWKKVL                                 | 7.3   | 16.0  |



|            |                                                                                                                                           |       |       |
|------------|-------------------------------------------------------------------------------------------------------------------------------------------|-------|-------|
| ATCC 19606 | WFWKLLWKALRLWWKVL                                                                                                                         | 6.7   | 16.0  |
| NA         | WFWKLLWKALRLWWKVL                                                                                                                         | 6.7   | 16.0  |
| ATCC 19606 | WGRRWRIRIPRLRPWPWPPRPKWPRSATINTDQ                                                                                                         | 2.0   | 8.1   |
| ATCC 19606 | WKRRIKIWKIR                                                                                                                               | 256.0 | 438.1 |
| NA         | WKRRIKIWKIR                                                                                                                               | 256.0 | 438.1 |
| ATCC 19606 | WLRRIKAWLRR                                                                                                                               | 16.0  | 24.9  |
| NA         | WLRRIKAWLRR                                                                                                                               | 64.0  | 99.5  |
| ATCC 19606 | WLRRIKAWLRRIKA                                                                                                                            | 2.0   | 3.7   |
| NA         | WLRRIKAWLRRIKA                                                                                                                            | 2.0   | 3.7   |
| NA         | WLRRIKAWLRRKRK                                                                                                                            | 4.0   | 7.9   |
| ATCC 19606 | WLRRIKAWLRRKRK                                                                                                                            | 16.0  | 31.5  |
| ATCC 15308 | WPKRLTKAHWFIEQHIQPSPLQCNRAMSGINNYTQHCKHQ<br>NTFLH                                                                                         | 0.9   | 5.1   |
| ATCC 15308 | WPKRLTKAHWFIEQHIQPSPLQCNRAMSGINNYTQHCKHQ<br>NTFLHDSFQNVAAVCDLLSIVCKNRRHCHQSSKPVNMTD<br>CRLTSGKYPQCRYSAQAQYKFFIVACDPPQKSDPPYKLVVH<br>LDSIL | 0.6   | 9.1   |
| ATCC 15308 | WPKRLTKAHWFIEQHIQPSPLQSNRAMSGINNYTQHSKHQN<br>TFLH                                                                                         | 1.2   | 6.5   |
| ATCC 19606 | WPRFPKPRKPTYPGPTYGPTWPRPTWRRSATIDTEH                                                                                                      | 32.0  | 141.8 |
| ATCC 19606 | WW                                                                                                                                        | 145.5 | 56.8  |
| ATCC 19606 | YSWPRMPRIPLPRYPYPRYPYPRWPRHPTIYA                                                                                                          | 1.0   | 4.2   |
| ATCC 19606 | YSWPRMPRIPLPRYPYPRYPYPRWPRWPRQPTIYA                                                                                                       | 4.0   | 18.5  |

**Table S2:** Dataset 1 containing unique antimicrobial peptides with activity against *A. baumannii*. By removing duplicate sequences from the Table S1 peptide list, we generated **Dataset 1** (374 sequences), and this dataset was used for designing novel HRZN peptides using our “DFT+PA” method.

| Strain     | Sequence                                         | $\mu\text{M}$ | $\mu\text{g/mL}$ |
|------------|--------------------------------------------------|---------------|------------------|
| ATCC 19606 | IDWKKVDWKKVSKKTCKVMLKACKFLG                      | 0.0           | 0.1              |
| ATCC 19606 | KWCFRVCYRGICYRRCR                                | 0.1           | 0.1              |
| NA         | KKWRWWLKALAKKLL                                  | 0.2           | 0.4              |
| ATCC 19606 | GFCWYVCVYRNGVRVCYRRCN                            | 0.2           | 0.5              |
| NA         | DSHAKRHHGYKRFHEKHHSRGY                           | 0.2           | 0.5              |
| ATCC 17978 | ALKSLLKTLAAKKKKLATLLKALSK                        | 0.2           | 0.6              |
| ATCC 821   | KLKSLKTLKAKKKLLKTALKALSK                         | 0.3           | 0.9              |
| ATCC 899   | KLKSLKTLKAKKKLLKTLLKALSK                         | 0.3           | 0.9              |
| ATCC 899   | KWKSFLKTFKAKKKVLKTALKALSK                        | 0.3           | 0.9              |
| NA         | CYCRIPACIAGERRYGTCTYQGRWLAFCC                    | 0.3           | 1.0              |
| NA         | DCYCRIPACIAGERRYGTCTYQGRWLAFCC                   | 0.3           | 1.0              |
| AB3        | GGLKKLGKKLEGAGKRVFKASEKALPVVVGKAIK               | 0.3           | 1.0              |
| NA         | KKWRKLLKKLKKLL                                   | 0.5           | 1.0              |
| NA         | KRFKKFFKKVKKSVKKRLKKIFKKPMVIGVTIPF               | 0.3           | 1.0              |
| M89955     | ALKSLLKTLAAKKKALATLLKALSK                        | 0.4           | 1.1              |
| NA         | KRFKKFFKKLKNVKKRVKKFFRKPRVIGVTIPF                | 0.3           | 1.1              |
| ATCC 19606 | ALKSLATLSKAKKKLLKTLLAALSK                        | 0.4           | 1.1              |
| ATCC 19606 | ALWMTLKKKVLKAAAKALNAVLVGANA                      | 0.4           | 1.1              |
| ATCC 15308 | RPPQFTRAQWFAIQHISLNPPRSTIAMRAINNYRWRSKNQNT<br>FL | 0.3           | 1.6              |
| NA         | KWKSFIKKLTKKFLHSAKKF                             | 0.6           | 1.6              |

|             |                                                     |     |     |
|-------------|-----------------------------------------------------|-----|-----|
| NA          | LKLSPKTKDTLKKVLKGAIKGAIAIASMA                       | 0.6 | 1.8 |
| ATCC 19606  | KWKSFLKTFSKAKKKLKTLLKAISK                           | 0.6 | 1.8 |
| M89955      | ALKSLLATLSKAAKKALKTLLAALSK                          | 0.7 | 1.9 |
| ATCC 19606  | KILRGVSKIMRRILTGKK                                  | 0.9 | 2.0 |
| ATCC 17978  | GGLKKLGKKLEGAGKRVFNAAEKALPVVAGAKALRK                | 0.5 | 2.0 |
| NA          | LKLKSIVSWAKKVL                                      | 1.2 | 2.0 |
| ATCC 19606  | KWKSFLKTFKSAVKTVLHTALKAISS                          | 0.7 | 2.0 |
| NA          | RRIRPRPPRLPRPRPLPFPRPGPRPIRPLPFP                    | 0.5 | 2.1 |
| ATCC 17978  | KWKSFLKTFSKAKKKALKTLLKAISK                          | 0.7 | 2.1 |
| ATCC 19606  | GCRRLCYQRCVTYCRGR                                   | 1.0 | 2.2 |
| NA          | KKWRKLLKWLAKK                                       | 1.3 | 2.3 |
| ATCC 19606  | VKGSWSKKFEVIA                                       | 1.6 | 2.3 |
| ATCC 19606  | KCRRLCYQRCVTYCRGR                                   | 1.0 | 2.3 |
| NA          | RIKRFWPVVIRTVVAGYNLYRAIKKK                          | 0.7 | 2.4 |
| ATCC 19606  | KCRRYCYQRCVTYCRGR                                   | 1.0 | 2.4 |
| ATCC 19606  | GCRRLCYQRCVTYCRGPFR                                 | 1.0 | 2.4 |
| AB5075      | TTSIRRRYQVSLIRRHGKR                                 | 1.0 | 2.5 |
| ATCC 15308  | QDGMVQRFLRQHVHPEETGGSDRYSNLMMQRRKMTLYHSK<br>RFNTFIH | 0.5 | 2.9 |
| NA          | GLLKPLLKIAAKVGSNLL                                  | 1.6 | 3.0 |
| ATCC 17978  | GKLTDKLKRGAKKALNVASKVAPIVAAGASIAR                   | 0.9 | 3.0 |
| AB2         | RWWRWWRWWRR                                         | 1.4 | 3.0 |
| ATCC 15308  | TIAMRAINNYRWRSKNQNTFLR                              | 1.1 | 3.0 |
| NA          | GILNTIKSIASKLKRKAK                                  | 1.6 | 3.1 |
| ATCC 19606  | KIAKVALKALKIAKGALKAL                                | 1.5 | 3.1 |
| NA          | GILKTIKSIASKLKRKAK                                  | 1.6 | 3.1 |
| NA          | KWKSFIKKLTSKFLHSAKKF                                | 1.3 | 3.1 |
| ATCC 19606  | KIAKVALKALKIAKVALKAL                                | 1.5 | 3.1 |
| ATCC 15308  | RPPQFTRAQWFAIQHISLNPPRSTIAMRAINNYRWRSKNQNT<br>FLR   | 0.6 | 3.3 |
| NM109       | GIWKTIKSMGKVFAGKILQNL                               | 1.5 | 3.5 |
| NA          | ALASLLKTLKAAKKALKTLLKALSA                           | 1.4 | 3.7 |
| ATCC 19606  | WLRRKAWLRRKA                                        | 2.0 | 3.7 |
| ATCC 19606  | ALWKLLKLLKSAKKLG                                    | 1.9 | 3.9 |
| ATCC 19606  | FFHHIFRGKVHVGKTIHRLVTG                              | 1.5 | 3.9 |
| NA          | RGGLCYCRGRCVCVGR                                    | 2.1 | 4.0 |
| ATCC 19606  | KISKKIMRTFLRRILTGKK                                 | 1.7 | 4.0 |
| ATCC 19606  | KISKKIMRTFLRRISKDILTGKK                             | 1.4 | 4.0 |
| NA          | KKRLKKIFKPMVIGVTIPF                                 | 1.7 | 4.0 |
| Q13         | LPRNRWSKIWKVVTVFS                                   | 1.7 | 4.0 |
| NA          | KKWRWWLALAKK                                        | 2.3 | 4.0 |
| CCARM 12035 | RWKIFKKIEKVGGRNVRDGIKAGPAVAVVGQAATVVK               | 1.0 | 4.0 |
| ATCC 15308  | AQWFAIQHISLNPPRSTIAMRAINNYRWRSKNQNTFLR              | 0.9 | 4.0 |
| ATCC 19606  | YSWPRMPRIPLPRYPRIYPRWPRHPTIYA                       | 1.0 | 4.2 |
| ATCC 19606  | FLKGIVGMLGKLF                                       | 3.0 | 4.3 |
| CCARM 12035 | RWKIFKKIPKFLHSAKKF                                  | 2.0 | 4.6 |
| NA          | RRGLFKKLRRKIKKGFKIFKRLPPVGVGVSIPLAGRR               | 1.1 | 4.7 |
| NA          | GRLRNLIKAGQNIRGKIQIGIRRIKDILKNLQPRPQV               | 1.1 | 4.7 |

|             |                                                                                                                                      |      |     |
|-------------|--------------------------------------------------------------------------------------------------------------------------------------|------|-----|
| ATCC 15308  | RPPQFTRAQWFAIQHISLNPPRCTIAMRAINNYRWCKNQNTFLRTTFANVVNVCGNQSIRCPHNRTLNNCHRSRFRVPLLHCDLINPGAQNISNCTYADRPGRRFYVVACDNRDPRDSPRYPVVPVHLDTTI | 0.3  | 4.8 |
| NA          | LVQRGRFGRFLKKVRRFIPKVIIAAQIGSRFG                                                                                                     | 1.3  | 4.8 |
| AB5075      | RLVRILVSKRPVAIKPYFRL                                                                                                                 | 2.0  | 4.9 |
| ATCC 19606  | KGGK                                                                                                                                 | 12.5 | 4.9 |
| CCARM 12036 | AFHHIFRGIVHVGKTIHRLVTG                                                                                                               | 2.0  | 5.0 |
| AB1         | RRWVRRVRRVRRVVRVRRWVRR                                                                                                               | 1.5  | 5.0 |
| NM8         | GFGSLLGKALRLGANVL                                                                                                                    | 3.0  | 5.1 |
| ATCC 15308  | WPKRLTKAHWFEIQHIQPSPLQCNRAMSGINNYTQHCKHQNTFLH                                                                                        | 0.9  | 5.1 |
| CCARM 12036 | FKHHIFRGIVHVGKTIHRLVTG                                                                                                               | 2.0  | 5.1 |
| CCARM 12005 | KFHHIFRGIVHVGKTIHRLVTG                                                                                                               | 2.0  | 5.1 |
| CCARM 12036 | FKHHIFRGIKHVGKTIHRLVTG                                                                                                               | 2.0  | 5.2 |
| CCARM 12036 | KFHHIFRGIKHVGKTIHRLVTG                                                                                                               | 2.0  | 5.2 |
| ATCC 9955   | GLFKKLRRKIKKGFKIFKRLPPIGVGVSIPLAGKR                                                                                                  | 1.3  | 5.2 |
| CCARM 12036 | FFHHIFRGIKHVGKTIHRLVTG                                                                                                               | 2.0  | 5.2 |
| ATCC 19606  | FVPWFSLKFLKRIL                                                                                                                       | 3.1  | 5.3 |
| ATCC 15308  | AQWFAIQHISLNPPRSTIAMRAINNYRWR                                                                                                        | 1.5  | 5.3 |
| CCARM 12036 | GLNALKKVFQGIHKAIKKINNHHVQ                                                                                                            | 2.0  | 5.4 |
| KCTC 2508   | GLNALKKVFQGIHEAIKKINNHHVQ                                                                                                            | 2.0  | 5.4 |
| ATCC 19606  | FVPWFSLKFLWRIL                                                                                                                       | 3.1  | 5.4 |
| NA          | LKLLKKLLKKLLKLL                                                                                                                      | 3.1  | 5.6 |
| NA          | INLKAIAALAKKLF                                                                                                                       | 3.7  | 5.7 |
| NM75        | GLKKIFKAGLSLVKGIAAHVAS                                                                                                               | 2.5  | 5.7 |
| NA          | RWKIFKKIEKMGRNIRDGIVKAGPAIEVLGSAKAIGK                                                                                                | 1.4  | 5.7 |
| NM35        | GFSSIFRGVAKFASKGLGKKLAKLVKLVACKISKQC                                                                                                 | 1.5  | 5.8 |
| ATCC 19606  | KNLRRIIRKIIHIIKKYG                                                                                                                   | 2.6  | 5.9 |
| NA          | LRKLRKRLVRLASHLRKLRKRL                                                                                                               | 2.1  | 6.0 |
| ATCC 15308  | KPKGMTSSQWFQIQHMQPSPQASNSAMKNINKHTKRSKDLNTFLH                                                                                        | 1.2  | 6.3 |
| NA          | KWWKWWKKWWKK                                                                                                                         | 3.3  | 6.3 |
| ATCC 19606  | RRRRRFRRVIRRIPLPKYLTINTE                                                                                                             | 2.0  | 6.5 |
| ATCC 15308  | WPKRLTKAHWFEIQHIQPSPLQSNRAMSGINNYTQHSKHQN                                                                                            | 1.2  | 6.5 |
| NA          | GLGSVLGKALKIGANLL                                                                                                                    | 4.0  | 6.5 |
| ATCC 19606  | KKLLKLLKLLK                                                                                                                          | 4.5  | 6.5 |
| ATCC 19606  | KKKK                                                                                                                                 | 12.5 | 6.6 |
| NM8         | ILGKLLKTAAKLLSNL                                                                                                                     | 4.0  | 6.8 |
| NA          | KWKLFKKIGIGAVLKVLTG                                                                                                                  | 3.1  | 6.9 |
| NM109       | GIWKTIKSMGKVFAGAIKQNL                                                                                                                | 3.0  | 6.9 |
| NM75        | GIWKTIKSMGKVFAGKIKQNL                                                                                                                | 3.0  | 7.0 |
| ATCC 19606  | RRRRRYRYWRRGLTIQGRPKSLPLNTGD                                                                                                         | 2.0  | 7.1 |
| NA          | AKKVFKRLGIGKFLHSAKKF                                                                                                                 | 3.1  | 7.2 |
| ATCC 17978  | KRWWKWIRW                                                                                                                            | 5.0  | 7.2 |
| ATCC 17978  | RKWWRWIKW                                                                                                                            | 5.0  | 7.2 |
| NA          | VWLSALKFIGKHLAKHQLSKL                                                                                                                | 3.1  | 7.5 |
| NA          | AMVSS                                                                                                                                | 15.2 | 7.5 |

|            |                                                                                                                                           |      |     |
|------------|-------------------------------------------------------------------------------------------------------------------------------------------|------|-----|
| NA         | KWKLFKKIGIGKFLHSAKKF                                                                                                                      | 3.1  | 7.5 |
| ATCC 17978 | ALKSLLKTLKAAAAALKTLKALSK                                                                                                                  | 2.9  | 7.7 |
| NA         | WLRRKAWLRRKRK                                                                                                                             | 4.0  | 7.9 |
| ATCC 19606 | RILRGVSRMRRLTGRR                                                                                                                          | 3.4  | 8.0 |
| ATCC 19606 | GRKKRRQRRRGGMWVTNLRTD                                                                                                                     | 2.8  | 8.0 |
| ATCC 19606 | KILRGVSKKIMRTFLRR                                                                                                                         | 3.8  | 8.0 |
| ATCC 19606 | KILRGVSKKIMRRISKDILTGKK                                                                                                                   | 3.0  | 8.0 |
| ATCC 19606 | KKIMRTFLRRISKDILTGKK                                                                                                                      | 3.3  | 8.0 |
| ATCC 19606 | KKIMRTFLRRISKKILTGKK                                                                                                                      | 3.3  | 8.0 |
| Q12        | NRFTARFRRTPWRLCLQFRQ                                                                                                                      | 3.0  | 8.0 |
| NA         | KSKEKIGKEFKRIVQRIKDFLRNLVPRTES                                                                                                            | 2.2  | 8.0 |
| Q13        | HLRRINKLLTRIGLYRHAFG                                                                                                                      | 3.3  | 8.0 |
| NA         | VQWRIRVAVIRK                                                                                                                              | 5.2  | 8.0 |
| NA         | GWFKKAWRKVKNAAGRRVLKGVGIHYGVGLI                                                                                                           | 2.4  | 8.0 |
| ATCC 19606 | AGYLLGKINLKALAALAKKIL                                                                                                                     | 3.7  | 8.0 |
| ATCC 19606 | AAYLLAKINLKALAALAKKIL                                                                                                                     | 3.6  | 8.0 |
| NA         | LKLKAIAALAKKKW                                                                                                                            | 5.1  | 8.0 |
| ATCC 19606 | KFWSLKKALRLWANVL                                                                                                                          | 3.8  | 8.0 |
| ATCC 19606 | KFWKLLKKALRLWAKVL                                                                                                                         | 3.7  | 8.0 |
| ATCC 19606 | KFWKLLKKALRLWKKVL                                                                                                                         | 3.6  | 8.0 |
| ATCC 19606 | WFKKLLKKALRLWKKVL                                                                                                                         | 3.6  | 8.0 |
| ATCC 19606 | LFWKLLLKALRLWAKVL                                                                                                                         | 3.8  | 8.0 |
| ATCC 19606 | KWLKKWLKWLKK                                                                                                                              | 4.7  | 8.0 |
| NA         | IKSIASKVANTVQKLKRKAKNAVA                                                                                                                  | 3.1  | 8.0 |
| NA         | LKAAAAAAKLAAKAAKAALKAAAAAAKL                                                                                                              | 3.2  | 8.1 |
| ATCC 19606 | WGRRWRIRIPRLRPWPWRPKWPRSATINTDQ                                                                                                           | 2.0  | 8.1 |
| NA         | KRGFGKKLRKRLKKFRNSIKRRLKNFNVVPIPLPG                                                                                                       | 1.9  | 8.1 |
| NA         | AMVGT                                                                                                                                     | 17.1 | 8.2 |
| NA         | GMASKAGSVLGKVAKVALKAAL                                                                                                                    | 4.0  | 8.3 |
| ATCC 19606 | FLSGIVGMLGKLF                                                                                                                             | 6.0  | 8.3 |
| ATCC 19606 | FLKGIVGMLGKLL                                                                                                                             | 6.0  | 8.3 |
| ATCC 19606 | ALWRRLRLRLRSARRLG                                                                                                                         | 3.8  | 8.5 |
| NA         | FFPVIGRILNGIL                                                                                                                             | 6.0  | 8.8 |
| ATCC 19606 | FLKGIVGMLGKLW                                                                                                                             | 6.0  | 8.8 |
| ATCC 15308 | WPKRLTKAHWFIEQHIQPSPLQCNRAMSGINNYTQHCKHQ<br>NTFLHDSFQNVAAVCDLLSIVCKNRRHCHQSSKPVNMTD<br>CRLTSGKYPQCRYSAQAQYKFFIVACDPPQKSDPPYKLVVH<br>LDSIL | 0.6  | 9.1 |
| NA         | GILKTIKSIASKVANTVQKLKRKAKNAV                                                                                                              | 3.1  | 9.3 |
| NA         | FALGAVTKRLPSLFLITRKC                                                                                                                      | 4.0  | 9.4 |
| NA         | KRRGSVTTRYQFLMIHLLRPKKLFA                                                                                                                 | 3.1  | 9.4 |
| NA         | RVRRFWPLVPVAINTVAAGINLYKAIRRK                                                                                                             | 2.8  | 9.5 |
| NA         | IKLSPKTKDNLKKVLKGAIKGAIIVAKMV                                                                                                             | 3.1  | 9.5 |
| NA         | IKLSPKTKKNLKKVLKGAIKGAIIVAKMV                                                                                                             | 3.1  | 9.5 |
| NA         | IKLSPETKKNLKKVLKGAIKGAIIVAKMV                                                                                                             | 3.1  | 9.5 |
| NA         | GILKTIKSIASKVANTVQKLKRKAKNAVA                                                                                                             | 3.1  | 9.5 |
| NA         | IKLSKTKDNLKKVLKGAIKGAIIVAKMV                                                                                                              | 3.1  | 9.6 |
| NA         | IKLSKETKKNLKKVLKGAIKGAIIVAKMV                                                                                                             | 3.1  | 9.6 |
| ATCC 19606 | FVQWFSKFLGKIL                                                                                                                             | 6.0  | 9.7 |

|             |                                    |      |      |
|-------------|------------------------------------|------|------|
| ATCC 19606  | LLQWLSKLLGRWL                      | 6.0  | 9.8  |
| ATCC 19606  | FVQWFSKFLGRIL                      | 6.0  | 9.8  |
| ATCC 19606  | LIRGLFKSFWQVF                      | 6.0  | 9.8  |
| CCARM 12036 | FAHHIFRGIVHVGKTIHRLVTG             | 4.0  | 10.0 |
| CCARM 12036 | FFHHIARGIVHVGKTIHRLVTG             | 4.0  | 10.0 |
| NA          | KIKKGFKKIFKRLPPIGVGVSIPLAGKR       | 3.3  | 10.0 |
| NA          | GLFKKLRRKIKKGFKKIFKRL              | 3.8  | 10.0 |
| ATCC 19606  | FVQWFSRFLGRIL                      | 6.0  | 10.0 |
| ATCC 19606  | FVRWFSKFLGRIL                      | 6.0  | 10.0 |
| ATCC 19606  | FVRWFSRFLGRIL                      | 6.0  | 10.2 |
| CCARM 12036 | FFHHIKRGIVHVGKTIHRLVTG             | 4.0  | 10.2 |
| CCARM 12036 | FFHHIKRGIKHVGKTIHRLVTG             | 4.0  | 10.3 |
| ATCC 19606  | FFGRLKSVWSAVKHGWKAASR              | 4.2  | 10.8 |
| NM8         | GFLGSLLKTGLKVGSNLL                 | 6.0  | 10.9 |
| NA          | GFWGKLWEGVKNAI                     | 7.0  | 11.2 |
| NM8         | GVIKSVLKGVAKTVALGML                | 6.0  | 11.3 |
| NM8         | GLKEIFKAGLSLVKGIAAHVAS             | 5.0  | 11.3 |
| NA          | GLGSLLGKAFKIGLKTVGKMMGGAPREQ       | 4.0  | 11.4 |
| NM75        | GLKKIFKAGLSLVKGIAHAVAS             | 5.0  | 11.6 |
| NA          | GIGAVLKVLTTGLPALISWIKRKRQQ         | 4.2  | 12.1 |
| NA          | KWKLFKKIPKFLHLAKKF                 | 5.4  | 12.5 |
| ATCC 19606  | FLSMIPHIVSGVAALAKHL                | 6.3  | 12.5 |
| ATCC 15308  | ISLNPPRSTIAMRAINNYRWRSKNQNTFLR     | 3.5  | 12.7 |
| ATCC 19606  | FLSLIPHIVSGVASIAKHF                | 6.3  | 12.7 |
| ATCC 19606  | FLSLIPHIVSGVASLAKHF                | 6.3  | 12.7 |
| NM8         | ILGKLLSTAAKLLSNL                   | 8.0  | 13.2 |
| NA          | IASKVANTVQKLKRKAKNAVA              | 6.3  | 14.0 |
| NA          | ILSAIWSGIKSLF                      | 10.0 | 14.3 |
| ATCC 17978  | NPEKALEKLIAIQKAIKGMLNGWFTGVGFRRKR  | 4.0  | 15.1 |
| ATCC 19606  | FFHHIFRPVHVGKTIHRLVTG              | 5.9  | 15.4 |
| NA          | IKSIASKVANTVQKLKRKAKNAV            | 6.3  | 15.6 |
| ATCC 15308  | GLFDIWKWWRWRR                      | 8.2  | 15.6 |
| NM35        | IKIPSFERNILKKVGKEAVSLIAGALKQS      | 5.0  | 15.8 |
| NA          | KWCFRVCYRGICYRKCR                  | 7.1  | 16.0 |
| NA          | VQLRIRVCVIRK                       | 10.8 | 16.0 |
| Q12         | TMSLRFWRWKVR                       | 9.6  | 16.0 |
| ATCC 19606  | KILGVSKKIMRRISKDILTGKK             | 6.4  | 16.0 |
| Q12         | QVRWWGRYWRRKWATCR                  | 6.7  | 16.0 |
| AB1         | QKKIRVRLSA                         | 13.4 | 16.0 |
| NA          | KRIVQRIKDFLRNLVPRTES               | 6.5  | 16.0 |
| DSM 30008   | VDKPPYLPRPRPPRIYNR                 | 6.7  | 16.0 |
| NA          | VQWRIRIAVIRA                       | 10.8 | 16.0 |
| NA          | KRFKKFFKKLKNSVKKRAKKFFKKPRVIGVSIPF | 3.9  | 16.0 |
| ATCC 19606  | GKKYRRFRWKFRKGRFWFWG               | 5.7  | 16.0 |
| ATCC 19606  | GRRYKKFRWKFKGRFWFWG                | 6.1  | 16.0 |
| ATCC 19606  | GKKYRRFRWKFKGKWFWWG                | 6.1  | 16.0 |
| ATCC 19606  | LLWKALRLWWKVL                      | 9.3  | 16.0 |
| ATCC 19606  | GKKYRRFWKFKGKWFWWG                 | 6.1  | 16.0 |
| ATCC 19606  | WFWKLLWKALRLWWKVL                  | 6.7  | 16.0 |

|             |                                                           |      |      |
|-------------|-----------------------------------------------------------|------|------|
| ATCC 19606  | GCRALCYKQRCVTYCRGA                                        | 8.0  | 16.4 |
| ATCC 19606  | LLKLLKLLKLLKL                                             | 10.0 | 18.1 |
| ATCC 19606  | YSWPRMPRIPLPRYPYPRYPYPRWPRWPRQPTIYA                       | 4.0  | 18.5 |
| ATCC 19606  | LLQWLSKLLGRLL                                             | 12.0 | 18.6 |
| NA          | IKLSPETKDNLKKVLKGAIKGAIIVAKMV                             | 6.3  | 19.2 |
| NA          | IKLSKETKDNLKKVLKGAIKGAIIVAKMV                             | 6.3  | 19.3 |
| ATCC 19606  | FLPWFSKFLGRIL                                             | 12.0 | 19.5 |
| ATCC 19606  | KKEK                                                      | 37.0 | 19.7 |
| ATCC 19606  | LLKLLKLLKLLKK                                             | 11.0 | 19.9 |
| CICC 22934  | SKVWRHWRRFWHRAHRKK                                        | 7.8  | 20.0 |
| NA          | LLKLLKKC                                                  | 18.4 | 20.0 |
| ATCC 19606  | FVPWFSKFLGRIL                                             | 12.5 | 20.1 |
| NA          | IWSAIWSGIKGLL                                             | 14.0 | 20.2 |
| ATCC 19606  | KK                                                        | 75.0 | 20.6 |
| CCARM 12036 | GLNALKKVFQPIHEAIKLINNHVQ                                  | 8.0  | 21.8 |
| CCARM 12036 | GLNALKKVFQPIHKAIKKINNHVQ                                  | 8.0  | 21.9 |
| ATCC 19606  | LRWTPTPSYPYPRYPTSRGSRWSR                                  | 8.0  | 22.9 |
| NM8         | GFSSIFRGVAKFASKGLGKDLAKLGVDLVACKISKQC                     | 6.0  | 23.1 |
| ATCC 15308  | RPPQFTRAQWFAIQHISLN                                       | 10.0 | 23.1 |
| NA          | GIWSSIKNLASKAWNSDIGQSLRNKAAGAINKFVADKIGVTP<br>SQAAS       | 5.0  | 24.4 |
| NA          | RRSKARGGSRGSKMGRKDSKGGSRGRPGSGSRPGGGSSIAGA<br>SRGDRGGTRNA | 4.7  | 24.4 |
| ATCC 19606  | WLRRIKAWLRR                                               | 16.0 | 24.9 |
| NA          | FLPAALAGIGGILGKLF                                         | 15.8 | 26.2 |
| ATCC 19606  | KLKLLKLLKLLKLLK                                           | 15.0 | 27.1 |
| ATCC 19606  | KGGGKWGGKGGK                                              | 25.0 | 27.9 |
| ATCC 19606  | KKLLKKLKKLLK                                              | 19.0 | 28.1 |
| NA          | GIWDTIKSMGKVFAGAILQNL                                     | 12.5 | 28.3 |
| NA          | GIWKTIKSMGKVFAGAILQNL                                     | 12.5 | 28.4 |
| ATCC 19606  | EKALEKLIAIQKAIKGMLNGWFTGVGFRRKR                           | 8.0  | 28.5 |
| NM35        | GIFPIFAKLLGKVIKVASSLISKGRTE                               | 10.0 | 28.7 |
| ATCC 17978  | KRWKWWRR                                                  | 20.0 | 29.8 |
| ATCC 15308  | FLGGLIKWWPWRR                                             | 18.2 | 31.3 |
| ATCC 15308  | FLGGLIKWKWPWWPWRR                                         | 13.5 | 31.3 |
| ATCC 15308  | GLFDIWKKLRWRR                                             | 17.6 | 31.3 |
| ATCC 15308  | GLFDIWKKWRWRR                                             | 16.9 | 31.3 |
| ATCC 15308  | GLFDIWAWWRWRR                                             | 16.9 | 31.3 |
| ATCC 19606  | ALWHLLHLLHLSAHLG                                          | 15.0 | 31.9 |
| NA          | CLRKLKRLLC                                                | 22.8 | 32.0 |
| SR 201346   | FLGGLIKIVPAMICAVTKKCHHHHHH                                | 10.9 | 32.0 |
| NA          | VQLRIRVCVIR                                               | 21.2 | 32.0 |
| Q12         | AWRWKAFRNCWRVRSSSL                                        | 13.9 | 32.0 |
| NA          | VQLRIRVAVIRA                                              | 23.0 | 32.0 |
| ATCC 19606  | KFHEKHSHRGY                                               | 20.5 | 32.0 |
| NA          | LRKLKRLLLRKLKRLL                                          | 13.5 | 32.0 |
| AB1         | VAKGLIKGVKAKGELPAKGVFKGLKESIGKRAVLKG                      | 8.7  | 32.0 |
| NA          | LLKKALRLWKKVL                                             | 19.9 | 32.0 |
| Q12         | SIKILKIYFIQGKRHWSF                                        | 14.1 | 32.0 |

|             |                                                     |       |      |
|-------------|-----------------------------------------------------|-------|------|
| NA          | GFWSSALEGLKKFAKGGLEALTNP                            | 12.5  | 33.1 |
| NA          | FLPLIGRVLSGIL                                       | 24.0  | 33.5 |
| ATCC 19606  | KAK                                                 | 100.0 | 34.5 |
| ATCC 19606  | FLKGIKGM LGKL                                       | 25.0  | 35.4 |
| ATCC 19606  | FLKGIVGKLGLF                                        | 25.0  | 35.5 |
| NA          | GFLGPLLKLGLKGVAKVLPHLIPSRQQ                         | 12.5  | 36.0 |
| ATCC 19606  | FLKGIKGM LGKL                                       | 25.0  | 36.3 |
| ATCC 19606  | GIGK                                                | 100.0 | 37.3 |
| NA          | GWANTLKNVAGGLCKITGAA                                | 19.3  | 37.5 |
| ATCC 19606  | FLFSLIPSAIGGLISAFK                                  | 20.0  | 37.6 |
| ATCC 19606  | KLK                                                 | 100.0 | 38.8 |
| CCARM 12036 | GLNALKKVFQPIHEAIKINNHHVQ                            | 16.0  | 43.8 |
| ATCC 19606  | DDALKKLLKLLKLL                                      | 25.0  | 44.2 |
| NM8         | GLKKIFKAGLSLKKGIAAHVAS                              | 20.0  | 45.9 |
| NM8         | GFSSIFRGVAKFASKGLGKDLAKLGVDLVASKISKQS               | 12.5  | 47.6 |
| ATCC 19606  | GIGKFLHS AKKFGKAFVGEIMNS                            | 20.0  | 49.3 |
| NM8         | GMATKAGTALGKVAKAVIGAAL                              | 25.0  | 50.0 |
| ATCC 15308  | KESRAKKFQRQHMDSDSSPSSSTYSNQMMRRRNMTQGRSK<br>PVNTFVH | 9.0   | 50.7 |
| NM8         | ILGKLLSTAAGLLKNL                                    | 32.0  | 52.0 |
| ATCC 15308  | KPKDMTSSQWFKTQHVQPSPQASNSAMSIINKYTERSKDLNT<br>FLH   | 10.0  | 52.1 |
| ATCC 15308  | KPPQFTWAQWFETQHINMTSQSTNAMQVINNYQRRSKNQ<br>NTFLL    | 10.0  | 54.6 |
| ATCC 15308  | QDNSRYTHFLTQHYDAKPQGRDDRYSESIMRRRGLTSPSKDI<br>NTFIH | 10.0  | 56.4 |
| ATCC 19606  | WW                                                  | 145.5 | 56.8 |
| NA          | GIWDTIKSMGKVFAGLILQNL                               | 25.0  | 57.6 |
| ATCC 19606  | KGIVGMLGKL                                          | 50.0  | 58.1 |
| NA          | FWGKLWEGVKNAI                                       | 38.0  | 58.8 |
| NA          | LGAWLAGKVAGTVATYAWNRYV                              | 25.0  | 59.2 |
| NA          | GLASTIGSLLGKFAKGGAQAF LQPK                          | 25.0  | 61.5 |
| ATCC 15308  | GLFDKWAWWRWRR                                       | 33.5  | 62.5 |
| ATCC 15308  | FLGGLIKWPWWPWR                                      | 31.3  | 62.5 |
| NA          | SKVWRHWRRFWHRAHRLH                                  | 25.0  | 63.8 |
| ATCC 19606  | GCRRWKKFRWRYRGKFWFWCG                               | 22.0  | 64.0 |
| ATCC 19606  | GCRRFKKFKKWRYRGRFWFWCFG                             | 20.3  | 64.0 |
| Q12         | KFVRLKIYCRDKNKGRGISF                                | 26.3  | 64.0 |
| ATCC 19606  | GIGKFLHSAGKFGKAFVGEIMKS                             | 26.6  | 64.0 |
| ATCC 19606  | GCKKYRRFRWKFKGKFWFWGG                               | 23.1  | 64.0 |
| ATCC 19606  | GCKKYRRFRWKFKGKFWFW                                 | 24.1  | 64.0 |
| Q12         | VLHTGYRKFLHRSKRFFHLR                                | 24.6  | 64.0 |
| NA          | KLLK                                                | 127.8 | 64.0 |
| DSM 3008    | TWLKKRRWKVKPP                                       | 34.6  | 64.0 |
| ATCC 19606  | KKKLKLLKLLK                                         | 50.0  | 75.6 |
| ATCC 19606  | FVQWFSKFLRL                                         | 48.0  | 81.5 |
| ATCC 19606  | FVPWFSKFLPRIL                                       | 50.0  | 82.5 |
| DSM 30007   | RWRWRW                                              | 85.0  | 88.8 |
| ATCC 19606  | DDALKHLLKHLLKHL                                     | 50.0  | 89.7 |

|            |                                                   |       |       |
|------------|---------------------------------------------------|-------|-------|
| ATCC 19606 | KKKLLLLLLLLLKKK                                   | 50.0  | 90.3  |
| ATCC 19606 | LLLLLKKKKKLLLL                                    | 50.0  | 90.3  |
| NA         | GLVGTLLGHIGKAILG                                  | 62.5  | 94.9  |
| NA         | GLVGTLLGHIGKAILS                                  | 62.5  | 96.8  |
| NA         | KVANTVQKLKRKAKNAVA                                | 50.0  | 98.4  |
| NM8        | ILGKLLSTAAGLLSNL                                  | 64.0  | 101.4 |
| ATCC 19606 | FSFLSRIF                                          | 100.0 | 101.6 |
| NM8        | ILGKLLKTAAGLLSNL                                  | 64.0  | 104.0 |
| ATCC 19606 | FFFLSRIF                                          | 100.0 | 107.6 |
| NA         | SAVGRHGRRFGLRKHRKH                                | 50.0  | 107.8 |
| NA         | IASKVANTVQKLKRKAKNAV                              | 50.0  | 108.4 |
| NA         | LKFLKFG                                           | 128.0 | 109.1 |
| ATCC 19606 | FFFLRRIF                                          | 100.0 | 114.5 |
| NA         | LKWLKWG                                           | 128.0 | 119.1 |
| ATCC 19606 | KAAAKWAAKAAK                                      | 100.0 | 121.4 |
| ATCC 15308 | FLGGLIKPWWPWRR                                    | 69.0  | 125.0 |
| NA         | LRWLRWG                                           | 128.0 | 126.2 |
| NA         | LRDLVCYCRTRGCKRRERMNGTCRKGHLMYTLCCR               | 30.1  | 128.0 |
| NA         | GIGDPVTCLKSGAICHPVFCPRRYKQIGTCGLPGTKCCKKP         | 29.5  | 128.0 |
| ATCC 19606 | KKIMRTFLRR                                        | 94.9  | 128.0 |
| ATCC 19606 | SMATPHVAGAAALILSKHPTWTNAQVRDRLESTATYLGNSF<br>YYGK | 26.1  | 128.0 |
| ICU 63169  | PRPRPRP                                           | 146.3 | 128.0 |
| ICU 63169  | PRPGPRP                                           | 165.0 | 128.0 |
| ATCC 19606 | KILRGVSKRILTGKK                                   | 75.4  | 128.0 |
| Q13        | GTAWRWHYRARS                                      | 82.8  | 128.0 |
| ICU 63169  | PRPLPRP                                           | 153.8 | 128.0 |
| NA         | AKRHHGYKRKFH                                      | 81.8  | 128.0 |
| Q13        | RSITRPVLVRRRWVRPVF                                | 52.2  | 128.0 |
| ATCC 19606 | KWKIFKKIEKVGGRNIRNGIHKAGPAVAVLGEAKAL              | 33.5  | 128.0 |
| ICU 63169  | PRPWPRP                                           | 141.4 | 128.0 |
| ATCC 19606 | AGYLLPKINLKPLAKLPKKIL                             | 54.9  | 128.0 |
| NA         | KRFKKFFKKVKKSV                                    | 71.2  | 128.0 |
| ATCC 19606 | KVVVKWVVKVVK                                      | 100.0 | 141.1 |
| ATCC 19606 | WPRFPKPRKPTYPGPTYPGPTWPRPTWRRSATIDTEH             | 32.0  | 141.8 |
| ATCC 19606 | KLLLKWLLKLLK                                      | 100.0 | 150.9 |
| NM8        | GFSSIFRGVAKFASKGLGKDLAKLGVDLVA                    | 50.0  | 152.6 |
| ATCC 19606 | DDALHLLHLLHLLHLL                                  | 100.0 | 182.1 |
| ATCC 19606 | DDALRHLLRHLLRHLL                                  | 100.0 | 187.8 |
| ATCC 19606 | DDALRLLRLLRLLRLL                                  | 100.0 | 193.5 |
| NA         | KKCGFFCKLKNKLKSTGSRSNIAAGTHGGTFRV                 | 56.4  | 200.0 |
| NA         | KKCKFFCKVKKKIKSIGFQIPIVSIPFK                      | 60.9  | 200.0 |
| NA         | TRWLWLLRGGLKAAGWGIRAHNLNRNQ                       | 65.7  | 200.0 |
| NA         | KFFKRLKSVRRRAVKKFRKKPRLIGLSTLL                    | 55.1  | 200.0 |
| NM8        | ILGKLLSTAAGLLSKL                                  | 128.0 | 204.5 |
| CICC 22934 | SKVGRHGRRFGHRAHRKL                                | 100.0 | 215.6 |
| NM8        | ILGAILPLVSGLLSNKL                                 | 128.0 | 220.3 |
| CICC 22934 | SAVGRHLRRFGLRKHRKH                                | 100.0 | 221.2 |
| CICC 22934 | SKVGRHLRRFGHRAHRKL                                | 100.0 | 221.2 |



|            |                                        |       |       |
|------------|----------------------------------------|-------|-------|
| CICC 22934 | SAVGRHLRRFLLRKHRKH                     | 100.0 | 226.8 |
| CICC 22934 | SKVGRHLRRFLHRAHRKL                     | 100.0 | 226.8 |
| CICC 22934 | SAVLRHLRRFLLRKHRKH                     | 100.0 | 232.4 |
| CICC 22934 | SKVLRHLRRFLHRAHRKL                     | 100.0 | 232.4 |
| ATCC 19606 | NPEKALEPLIAIQIAIKGMLNGWFTGVGFRRKR      | 64.0  | 238.4 |
| ATCC 15308 | FLGGLIKRPPAMICAVRKKC                   | 113.5 | 250.0 |
| ATCC 15308 | FLGGLIKRVPAMICAVRKKC                   | 113.4 | 250.0 |
| ATCC 15308 | FLGGLIKPVPAMICAVRKKC                   | 116.6 | 250.0 |
| ATCC 15308 | FLGGLIKIVPAMICAVRKKC                   | 115.7 | 250.0 |
| NA         | PPPVIKFNRPFMLWIVERDTRSILFMGKIVNPKAP    | 60.8  | 250.0 |
| ATCC 15308 | RLPWRWPRRPWRR                          | 130.3 | 250.0 |
| NA         | KTRNWFSEHFKKVKEKLKDTFA                 | 90.3  | 250.0 |
| NA         | FSTKTRNWFSEHFKKVKEKLKDTFA              | 80.6  | 250.0 |
| ATCC 15308 | RRPWRWPRWPWRR                          | 125.5 | 250.0 |
| ATCC 15308 | RRPWRWPWWPWRR                          | 123.7 | 250.0 |
| ATCC 15308 | LLPWKWPWWKWRR                          | 129.0 | 250.0 |
| ATCC 19606 | FASGIAGMAGKLF                          | 200.0 | 253.9 |
| ATCC 19606 | DHYNVCVSSGGQCLYSACPIFTKIQGTCYRGKAKCCK  | 65.1  | 256.0 |
| ATCC 19606 | KISKIMRTFLRR                           | 152.6 | 256.0 |
| ATCC 19606 | AGRKGQGGKVRAKAKTRSSRAGLQFPVGRVHRLLRKGN | 60.1  | 256.0 |
| ATCC 19606 | ISKRILTGKK                             | 223.9 | 256.0 |
| ATCC 19606 | FAKGIAGMAGKLF                          | 200.0 | 262.1 |
| NM124      | KFASKGLGKDLAKLGVDLVACKISKQC            | 100.0 | 282.1 |
| ATCC 19606 | KLAKLAKKLAKLAK                         | 196.9 | 300.0 |
| ATCC 19606 | AVAGEKLWLLPHLLKMLLTPTP                 | 163.8 | 400.0 |
| ATCC 19606 | FLSLIPHIVSGVASLAIHF                    | 200.0 | 404.3 |
| ATCC 19606 | WKRRIKIWKKIR                           | 256.0 | 438.1 |
| NM8        | GLGKDLAKLGVDLVACKISKQC                 | 200.0 | 452.0 |
| NM8        | KGLGKDLAKLGVDLVACKISKQC                | 200.0 | 477.6 |
| NM35       | RGVAKFASKGLGKDLAKLGVDLVACKISKQC        | 200.0 | 641.0 |
